# Supplementary material for: Morphological Physiological and Transcriptional Response to Low Nitrogen Stress in Populus Deltoides Marsh. Clones With Contrasting Nitrogen Use Efficiency
Source: Research Square preprint supplement (doi:10.21203/rs.3.rs-149379/v1), 2021-01-23
Supplement: Supplementary file 1 [file 267cc216285ba4370499cd08.xlsx]

## Sheet: Table S1
Table S1. Low nitrogen adaptation coefficients of traits of N-efficient and N-inefficient genotypes
Traits	N-efficient genotypes				N-inefficient genotypes
	A-1	A-2	A-3	Mean	C-1	C-2	C-3	Mean
Height(Hn)	0.911	0.901	0.932	0.914±0.016a	0.895	0.901	0.892	0.896±0.005a
Ground diameter(GDn)	0.972	0.982	0.959	0.971±0.011a	0.933	0.946	0.943	0.941±0.007b
Fresh weight of stem (SFW)	0.868	0.875	0.87	0.871±0.004a	0.848	0.85	0.845	0.848±0.002b
Dry weight of stem (SDW)	0.822	0.858	0.847	0.843±0.018a	0.732	0.78	0.771	0.761±0.026b
Fresh weight of root (RFW)	1.003	1.007	1.017	1.009±0.007a	0.882	0.818	0.85	0.850±0.032b
Dry weight of root (RDW)	0.838	0.851	0.887	0.858±0.025a	0.833	0.818	0.85	0.834±0.016a
Fresh weight of leaf (LFW)	0.883	0.83	0.831	0.848±0.030a	0.765	0.76	0.697	0.741±0.038b
Dry weight of leaf (LDW)	0.971	0.961	0.93	0.954±0.021a	0.759	0.859	0.719	0.779±0.072b
Chlorophyll a (Chl a)	0.609	0.669	0.769	0.682±0.081a	0.598	0.613	0.526	0.579±0.046a
Chlorophyll b (Chl b)	0.547	0.585	0.713	0.615±0.087a	0.598	0.506	0.452	0.519±0.074a
Carotenoid (Car)	0.667	0.721	0.819	0.736±0.077a	0.778	0.705	0.55	0.678±0.116a
Chlorophyll (a+b) (Chl)	0.594	0.648	0.755	0.666±0.082a	0.598	0.585	0.509	0.564±0.048a
Leaf area (LA)	0.932	0.772	0.831	0.845±0.081a	0.737	0.706	0.639	0.694±0.050a
Leaf length（LL）	0.969	0.834	0.914	0.906±0.068a	0.933	0.852	0.759	0.848±0.087a
Leaf width（LW）	0.933	0.902	0.895	0.910±0.020a	0.924	0.842	0.795	0.854±0.065a
Data indicate mean + SD (n=3). Different letters in the same row indicate signiﬁcant difference between N-efficient and N-inefficient genotypes (p < 0.05).

## Sheet: Table S2
Table S2. Results of quality analysis of RNA sequencing data
Samples	Raw reads number	Clean reads number	Clean reads rate	Low-quality reads rate	Clean Q30 bases rate	Uniquemap rate	Multimap rate	Mapping rate
T0-A-1	47111898	47052882	0.9987	0.001	0.9354	0.852	0.0784	0.9303
T0-A-2	53832154	53757046	0.9986	0.0011	0.9288	0.7689	0.0859	0.8548
T0-A-3	46676400	46601028	0.9984	0.0013	0.9295	0.8669	0.0744	0.9414
T2-LN-A-1	36919946	36866796	0.9986	0.0012	0.9309	0.8643	0.0772	0.9415
T2-LN-A-2	61221508	61136254	0.9986	0.0011	0.9308	0.865	0.0772	0.9422
T2-LN-A-3	57120436	57030040	0.9984	0.0013	0.9306	0.8617	0.0763	0.938
T4-LN-A-1	59654750	59559628	0.9984	0.0013	0.9265	0.867	0.0752	0.9422
T4-LN-A-2	48902386	48825716	0.9984	0.0012	0.9246	0.8587	0.0763	0.935
T4-LN-A-3	51512210	51435658	0.9985	0.0012	0.9313	0.8725	0.0757	0.9482
T6-LN-A-1	54543164	54477228	0.9988	0.001	0.9313	0.8646	0.0753	0.9399
T6-LN-A-2	39940694	39896490	0.9989	0.0009	0.9335	0.8648	0.0765	0.9413
T6-LN-A-3	41906632	41847910	0.9986	0.0011	0.9299	0.8609	0.0748	0.9358
T0-C-1	47043260	46995874	0.999	0.0008	0.9328	0.8584	0.0785	0.9369
T0-C-2	42831084	42775162	0.9987	0.001	0.9297	0.8645	0.0755	0.94
T0-C-3	49617178	49540890	0.9985	0.0012	0.929	0.8527	0.075	0.9276
T2-LN-C-1	55933320	55868618	0.9988	0.001	0.9343	0.8591	0.0785	0.9376
T2-LN-C-2	41432596	41374472	0.9986	0.0012	0.9308	0.8685	0.0745	0.943
T2-LN-C-3	48280692	48218364	0.9987	0.0011	0.9329	0.8585	0.0781	0.9366
T4-LN-C-1	41756518	41709044	0.9989	0.0009	0.9313	0.8706	0.0769	0.9474
T4-LN-C-2	41311276	41257154	0.9987	0.0011	0.9311	0.8674	0.0743	0.9417
T4-LN-C-3	46608524	46540014	0.9985	0.0012	0.9304	0.8485	0.0778	0.9263
T6-LN-C-1	42642984	42587984	0.9987	0.001	0.9313	0.8675	0.074	0.9416
T6-LN-C-2	36947376	36904746	0.9988	0.001	0.933	0.8763	0.0747	0.9509
T6-LN-C-3	40673712	40604560	0.9983	0.0014	0.93	0.8547	0.0748	0.9295
Mean	47267529	47202648	0.9986	0.0011	0.9308	0.8589	0.0765	0.9354

## Sheet: Table S3
Table S3. Results of the GO functional enrichment analysis of genes in the ‘magenta’ module
Class	ID	Descrption	Pvalue	Qvalue
Cellular Component	GO:0016020	membrane	0.000888399	0.0302055
Molecular Function	GO:0003824	catalytic activity	0.000424493	0.0331922
Molecular Function	GO:0004672	protein kinase activity	0.00061467	0.0331922
Molecular Function	GO:0016773	phosphotransferase activity, alcohol group as acceptor	0.00101326	0.0364772
Biological Process	GO:0006950	response to stress	0.000542209	0.0382643
Biological Process	GO:0010466	negative regulation of peptidase activity	0.000589345	0.0382643
Biological Process	GO:0030162	regulation of proteolysis	0.000589345	0.0382643
Biological Process	GO:0045861	negative regulation of proteolysis	0.000589345	0.0382643
Biological Process	GO:0052547	regulation of peptidase activity	0.000589345	0.0382643
Biological Process	GO:0043086	negative regulation of catalytic activity	0.000811897	0.0382643
Biological Process	GO:0044092	negative regulation of molecular function	0.000811897	0.0382643
Biological Process	GO:0051346	negative regulation of hydrolase activity	0.000811897	0.0382643
Biological Process	GO:0032269	negative regulation of cellular protein metabolic process	0.00100961	0.0382643
Biological Process	GO:0051248	negative regulation of protein metabolic process	0.00100961	0.0382643
Molecular Function	GO:0016772	transferase activity, transferring phosphorus-containing groups	0.00182142	0.0429866
Molecular Function	GO:0016301	kinase activity	0.00199012	0.0429866
Molecular Function	GO:0042578	phosphoric ester hydrolase activity	0.00251929	0.0453472
Molecular Function	GO:0016740	transferase activity	0.00313658	0.048393
Biological Process	GO:0006468	protein phosphorylation	0.00158612	0.054649
Biological Process	GO:0006796	phosphate-containing compound metabolic process	0.0034427	0.102833
Biological Process	GO:0050896	response to stimulus	0.00352726	0.102833
Biological Process	GO:0009605	response to external stimulus	0.00391695	0.106037
Biological Process	GO:0006793	phosphorus metabolic process	0.00420067	0.106137
Biological Process	GO:0016310	phosphorylation	0.00557998	0.132176
Molecular Function	GO:0004713	protein tyrosine kinase activity	0.0103835	0.140177
Biological Process	GO:0009698	phenylpropanoid metabolic process	0.00658283	0.146758
Biological Process	GO:0051336	regulation of hydrolase activity	0.00751935	0.158324
Molecular Function	GO:0035251	UDP-glucosyltransferase activity	0.0135461	0.162553
Biological Process	GO:0050790	regulation of catalytic activity	0.00860565	0.17166
Biological Process	GO:0009991	response to extracellular stimulus	0.00906517	0.171785
Biological Process	GO:0065009	regulation of molecular function	0.0102767	0.18547
Molecular Function	GO:0042083	5,10-methylenetetrahydrofolate-dependent methyltransferase activity	0.0173549	0.187433
Biological Process	GO:0009620	response to fungus	0.0123509	0.212772
Biological Process	GO:0009699	phenylpropanoid biosynthetic process	0.0138013	0.227422
Biological Process	GO:0009157	deoxyribonucleoside monophosphate biosynthetic process	0.0187219	0.253414
Biological Process	GO:0009162	deoxyribonucleoside monophosphate metabolic process	0.0187219	0.253414
Biological Process	GO:0009176	pyrimidine deoxyribonucleoside monophosphate metabolic process	0.0187219	0.253414
Biological Process	GO:0009177	pyrimidine deoxyribonucleoside monophosphate biosynthetic process	0.0187219	0.253414
Biological Process	GO:0042752	regulation of circadian rhythm	0.0187219	0.253414
Molecular Function	GO:0004779	sulfate adenylyltransferase activity	0.0259208	0.254495
Molecular Function	GO:0046527	glucosyltransferase activity	0.0287742	0.258968
Biological Process	GO:0031324	negative regulation of cellular metabolic process	0.0198717	0.259702
Molecular Function	GO:0016788	hydrolase activity, acting on ester bonds	0.034833	0.289381
Molecular Function	GO:0031406	carboxylic acid binding	0.0404629	0.291333
Molecular Function	GO:0043177	organic acid binding	0.0404629	0.291333
Molecular Function	GO:0015036	disulfide oxidoreductase activity	0.0477229	0.32213
Molecular Function	GO:0016641	oxidoreductase activity, acting on the CH-NH2 group of donors, oxygen as acceptor	0.0511798	0.325142
Biological Process	GO:0048523	negative regulation of cellular process	0.0289038	0.331306
Biological Process	GO:0009247	glycolipid biosynthetic process	0.0295901	0.331306
Biological Process	GO:0080090	regulation of primary metabolic process	0.0310587	0.331306
Biological Process	GO:0032268	regulation of cellular protein metabolic process	0.0311788	0.331306
Biological Process	GO:0051246	regulation of protein metabolic process	0.0311788	0.331306
Biological Process	GO:0051704	multi-organism process	0.0333895	0.331306
Biological Process	GO:0010941	regulation of cell death	0.0343966	0.331306
Biological Process	GO:0043067	regulation of programmed cell death	0.0343966	0.331306
Biological Process	GO:0051234	establishment of localization	0.0350783	0.331306
Biological Process	GO:0006952	defense response	0.0380784	0.331306
Biological Process	GO:0031323	regulation of cellular metabolic process	0.0384764	0.331306
Biological Process	GO:0006664	glycolipid metabolic process	0.0387103	0.331306
Biological Process	GO:1903509	liposaccharide metabolic process	0.0387103	0.331306
Biological Process	GO:0012501	programmed cell death	0.0397706	0.331306
Biological Process	GO:0006813	potassium ion transport	0.0416389	0.331306
Biological Process	GO:0010647	positive regulation of cell communication	0.0416389	0.331306
Biological Process	GO:0071804	cellular potassium ion transport	0.0416389	0.331306
Biological Process	GO:0071805	potassium ion transmembrane transport	0.0416389	0.331306
Biological Process	GO:0046467	membrane lipid biosynthetic process	0.0419596	0.331306
Molecular Function	GO:0016758	transferase activity, transferring hexosyl groups	0.058545	0.340648
Molecular Function	GO:0016628	oxidoreductase activity, acting on the CH-CH group of donors, NAD or NADP as acceptor	0.0599287	0.340648
Molecular Function	GO:0016491	oxidoreductase activity	0.0631465	0.340991
Biological Process	GO:0008219	cell death	0.0455463	0.347648
Biological Process	GO:0009411	response to UV	0.0475931	0.347648
Biological Process	GO:0016265	death	0.054582	0.347648
Biological Process	GO:0051179	localization	0.0546645	0.347648
Biological Process	GO:0006020	inositol metabolic process	0.0551349	0.347648
Biological Process	GO:0007623	circadian rhythm	0.0551349	0.347648
Biological Process	GO:0009396	folic acid-containing compound biosynthetic process	0.0551349	0.347648
Biological Process	GO:0016032	viral process	0.0551349	0.347648
Biological Process	GO:0042559	pteridine-containing compound biosynthetic process	0.0551349	0.347648
Biological Process	GO:0006464	cellular protein modification process	0.0556289	0.347648
Biological Process	GO:0036211	protein modification process	0.0580221	0.347648
Biological Process	GO:0042398	cellular modified amino acid biosynthetic process	0.0595918	0.347648
Biological Process	GO:0009267	cellular response to starvation	0.059623	0.347648
Biological Process	GO:0009642	response to light intensity	0.059623	0.347648
Biological Process	GO:0031667	response to nutrient levels	0.059623	0.347648
Biological Process	GO:0031669	cellular response to nutrient levels	0.059623	0.347648
Biological Process	GO:0042594	response to starvation	0.059623	0.347648
Biological Process	GO:0044267	cellular protein metabolic process	0.0628023	0.35873
Biological Process	GO:0006643	membrane lipid metabolic process	0.0634167	0.35873
Biological Process	GO:0031668	cellular response to extracellular stimulus	0.0659904	0.362469
Biological Process	GO:0071496	cellular response to external stimulus	0.0659904	0.362469
Molecular Function	GO:0043566	structure-specific DNA binding	0.0798343	0.366687
Molecular Function	GO:0016667	oxidoreductase activity, acting on a sulfur group of donors	0.083385	0.366687
Molecular Function	GO:0016757	transferase activity, transferring glycosyl groups	0.0844424	0.366687
Molecular Function	GO:0016627	oxidoreductase activity, acting on the CH-CH group of donors	0.0849596	0.366687
Molecular Function	GO:0016413	O-acetyltransferase activity	0.0878637	0.366687
Molecular Function	GO:0008194	UDP-glycosyltransferase activity	0.0882764	0.366687
Biological Process	GO:0048522	positive regulation of cellular process	0.0683958	0.370315
Biological Process	GO:0044550	secondary metabolite biosynthetic process	0.0712408	0.373052
Biological Process	GO:0048518	positive regulation of biological process	0.0714361	0.373052
Biological Process	GO:0044403	symbiosis, encompassing mutualism through parasitism	0.0728386	0.373052
Biological Process	GO:0044419	interspecies interaction between organisms	0.0728386	0.373052
Biological Process	GO:0043207	response to external biotic stimulus	0.0758439	0.378221
Biological Process	GO:0051707	response to other organism	0.0758439	0.378221
Molecular Function	GO:0016857	racemase and epimerase activity, acting on carbohydrates and derivatives	0.103716	0.387491
Molecular Function	GO:0005267	potassium channel activity	0.107636	0.387491
Molecular Function	GO:0015079	potassium ion transmembrane transporter activity	0.107636	0.387491
Molecular Function	GO:0070566	adenylyltransferase activity	0.107636	0.387491
Molecular Function	GO:0016638	oxidoreductase activity, acting on the CH-NH2 group of donors	0.11154	0.388591
Biological Process	GO:0006826	iron ion transport	0.0815674	0.391437
Biological Process	GO:0010243	response to organonitrogen compound	0.0821301	0.391437
Biological Process	GO:0009607	response to biotic stimulus	0.0823755	0.391437
Biological Process	GO:0044710	single-organism metabolic process	0.0826252	0.391437
Biological Process	GO:0043412	macromolecule modification	0.0855902	0.400477
Biological Process	GO:0009719	response to endogenous stimulus	0.0877663	0.405652
Biological Process	GO:0019748	secondary metabolic process	0.0890205	0.406491
Molecular Function	GO:0036094	small molecule binding	0.125391	0.423196
Biological Process	GO:0006026	aminoglycan catabolic process	0.0945088	0.426415
Biological Process	GO:0006760	folic acid-containing compound metabolic process	0.0987826	0.430329
Biological Process	GO:0019932	second-messenger-mediated signaling	0.0987826	0.430329
Biological Process	GO:0042558	pteridine-containing compound metabolic process	0.0987826	0.430329
Biological Process	GO:0007602	phototransduction	0.103036	0.437156
Biological Process	GO:1901136	carbohydrate derivative catabolic process	0.103036	0.437156
Biological Process	GO:0044699	single-organism process	0.10442	0.437156
Biological Process	GO:0010605	negative regulation of macromolecule metabolic process	0.106985	0.437156
Biological Process	GO:0009582	detection of abiotic stimulus	0.10727	0.437156
Biological Process	GO:0009583	detection of light stimulus	0.10727	0.437156
Molecular Function	GO:0005261	cation channel activity	0.134611	0.440545
Biological Process	GO:0016049	cell growth	0.111324	0.441019
Biological Process	GO:0006022	aminoglycan metabolic process	0.11568	0.441019
Biological Process	GO:0009739	response to gibberellin	0.11568	0.441019
Biological Process	GO:0010476	gibberellin mediated signaling pathway	0.11568	0.441019
Biological Process	GO:0071370	cellular response to gibberellin stimulus	0.11568	0.441019
Biological Process	GO:0019438	aromatic compound biosynthetic process	0.119812	0.441019
Biological Process	GO:0009129	pyrimidine nucleoside monophosphate metabolic process	0.119855	0.441019
Biological Process	GO:0009130	pyrimidine nucleoside monophosphate biosynthetic process	0.119855	0.441019
Biological Process	GO:0009581	detection of external stimulus	0.119855	0.441019
Biological Process	GO:0044764	multi-organism cellular process	0.119855	0.441019
Biological Process	GO:0019538	protein metabolic process	0.124198	0.452606
Biological Process	GO:0009416	response to light stimulus	0.127032	0.458186
Biological Process	GO:0009891	positive regulation of biosynthetic process	0.128147	0.458186
Biological Process	GO:1901700	response to oxygen-containing compound	0.133642	0.473367
Molecular Function	GO:0008374	O-acyltransferase activity	0.153385	0.475493
Molecular Function	GO:0046906	tetrapyrrole binding	0.154095	0.475493
Biological Process	GO:0019827	stem cell population maintenance	0.140441	0.47805
Biological Process	GO:0098727	maintenance of cell number	0.140441	0.47805
Biological Process	GO:0009893	positive regulation of metabolic process	0.141187	0.47805
Biological Process	GO:0009826	unidimensional cell growth	0.144501	0.47805
Biological Process	GO:0042127	regulation of cell proliferation	0.144501	0.47805
Biological Process	GO:0002252	immune effector process	0.152564	0.47805
Biological Process	GO:0051606	detection of stimulus	0.152564	0.47805
Biological Process	GO:0060560	developmental growth involved in morphogenesis	0.152564	0.47805
Biological Process	GO:0007154	cell communication	0.154401	0.47805
Biological Process	GO:0009617	response to bacterium	0.15582	0.47805
Biological Process	GO:0009314	response to radiation	0.162346	0.47805
Biological Process	GO:0006351	transcription, DNA-templated	0.165062	0.47805
Biological Process	GO:0042221	response to chemical	0.167418	0.47805
Biological Process	GO:1901362	organic cyclic compound biosynthetic process	0.167712	0.47805
Biological Process	GO:0097659	nucleic acid-templated transcription	0.168711	0.47805
Biological Process	GO:0032147	activation of protein kinase activity	0.170773	0.47805
Biological Process	GO:0033674	positive regulation of kinase activity	0.170773	0.47805
Biological Process	GO:0045860	positive regulation of protein kinase activity	0.170773	0.47805
Biological Process	GO:0051347	positive regulation of transferase activity	0.170773	0.47805
Biological Process	GO:0071229	cellular response to acid chemical	0.170773	0.47805
Biological Process	GO:0009808	lignin metabolic process	0.172396	0.47805
Biological Process	GO:0048511	rhythmic process	0.172396	0.47805
Biological Process	GO:0002376	immune system process	0.175812	0.47805
Biological Process	GO:0043473	pigmentation	0.176307	0.47805
Biological Process	GO:0043476	pigment accumulation	0.176307	0.47805
Biological Process	GO:0043478	pigment accumulation in response to UV light	0.176307	0.47805
Biological Process	GO:0043479	pigment accumulation in tissues in response to UV light	0.176307	0.47805
Biological Process	GO:0043480	pigment accumulation in tissues	0.176307	0.47805
Biological Process	GO:0001934	positive regulation of protein phosphorylation	0.177497	0.47805
Biological Process	GO:0010562	positive regulation of phosphorus metabolic process	0.177497	0.47805
Biological Process	GO:0042327	positive regulation of phosphorylation	0.177497	0.47805
Biological Process	GO:0045937	positive regulation of phosphate metabolic process	0.177497	0.47805
Biological Process	GO:1901698	response to nitrogen compound	0.180874	0.47805
Biological Process	GO:0043085	positive regulation of catalytic activity	0.182567	0.47805
Biological Process	GO:0044093	positive regulation of molecular function	0.182567	0.47805
Biological Process	GO:0031401	positive regulation of protein modification process	0.187659	0.47805
Biological Process	GO:0032270	positive regulation of cellular protein metabolic process	0.187659	0.47805
Biological Process	GO:0051247	positive regulation of protein metabolic process	0.187659	0.47805
Biological Process	GO:0050794	regulation of cellular process	0.190177	0.47805
Biological Process	GO:0010033	response to organic substance	0.19024	0.47805
Biological Process	GO:0010604	positive regulation of macromolecule metabolic process	0.191065	0.47805
Biological Process	GO:0033554	cellular response to stress	0.191566	0.47805
Biological Process	GO:0006544	glycine metabolic process	0.19177	0.47805
Biological Process	GO:1901607	alpha-amino acid biosynthetic process	0.19177	0.47805
Biological Process	GO:0031325	positive regulation of cellular metabolic process	0.19619	0.47805
Biological Process	GO:0065008	regulation of biological quality	0.198892	0.47805
Biological Process	GO:0006810	transport	0.200076	0.47805
Biological Process	GO:0019725	cellular homeostasis	0.201333	0.47805
Biological Process	GO:0043549	regulation of kinase activity	0.201333	0.47805
Biological Process	GO:0045859	regulation of protein kinase activity	0.201333	0.47805
Biological Process	GO:0051338	regulation of transferase activity	0.201333	0.47805
Biological Process	GO:0006405	RNA export from nucleus	0.203179	0.47805
Biological Process	GO:0051168	nuclear export	0.203179	0.47805
Biological Process	GO:0009889	regulation of biosynthetic process	0.20571	0.47805
Biological Process	GO:0009892	negative regulation of metabolic process	0.20848	0.47805
Biological Process	GO:0006575	cellular modified amino acid metabolic process	0.210696	0.47805
Biological Process	GO:0006605	protein targeting	0.210925	0.47805
Biological Process	GO:0001932	regulation of protein phosphorylation	0.211666	0.47805
Biological Process	GO:0042325	regulation of phosphorylation	0.213393	0.47805
Biological Process	GO:0006403	RNA localization	0.214429	0.47805
Biological Process	GO:0050657	nucleic acid transport	0.214429	0.47805
Biological Process	GO:0050658	RNA transport	0.214429	0.47805
Biological Process	GO:0051236	establishment of RNA localization	0.214429	0.47805
Biological Process	GO:0032774	RNA biosynthetic process	0.21756	0.482194
Biological Process	GO:0006498	N-terminal protein lipidation	0.221842	0.484869
Biological Process	GO:0031365	N-terminal protein amino acid modification	0.221842	0.484869
Biological Process	GO:0008283	cell proliferation	0.225523	0.484869
Biological Process	GO:0009755	hormone-mediated signaling pathway	0.228212	0.484869
Biological Process	GO:0032870	cellular response to hormone stimulus	0.228212	0.484869
Biological Process	GO:0071495	cellular response to endogenous stimulus	0.228212	0.484869
Biological Process	GO:0019220	regulation of phosphate metabolic process	0.229001	0.484869
Biological Process	GO:0051174	regulation of phosphorus metabolic process	0.229001	0.484869
Biological Process	GO:0006508	proteolysis	0.235705	0.489183
Biological Process	GO:0098660	inorganic ion transmembrane transport	0.236462	0.489183
Biological Process	GO:0098662	inorganic cation transmembrane transport	0.236462	0.489183
Biological Process	GO:0006497	protein lipidation	0.240074	0.489183
Biological Process	GO:0042157	lipoprotein metabolic process	0.240074	0.489183
Biological Process	GO:0042158	lipoprotein biosynthetic process	0.240074	0.489183
Biological Process	GO:0048588	developmental cell growth	0.240074	0.489183
Molecular Function	GO:0016854	racemase and epimerase activity	0.164457	0.493371
Biological Process	GO:0009814	defense response, incompatible interaction	0.24367	0.493854
Molecular Function	GO:0016209	antioxidant activity	0.186174	0.50035
Molecular Function	GO:0004702	receptor signaling protein serine/threonine kinase activity	0.187116	0.50035
Molecular Function	GO:0005057	receptor signaling protein activity	0.187116	0.50035
Molecular Function	GO:0004620	phospholipase activity	0.193289	0.50035
Molecular Function	GO:0015399	primary active transmembrane transporter activity	0.196603	0.50035
Molecular Function	GO:0015405	P-P-bond-hydrolysis-driven transmembrane transporter activity	0.196603	0.50035
Molecular Function	GO:0005216	ion channel activity	0.203846	0.50035
Molecular Function	GO:0022838	substrate-specific channel activity	0.203846	0.50035
Biological Process	GO:0001101	response to acid chemical	0.248293	0.500549
Biological Process	GO:0048519	negative regulation of biological process	0.252091	0.504717
Biological Process	GO:0006913	nucleocytoplasmic transport	0.254356	0.504717
Biological Process	GO:0051169	nuclear transport	0.254356	0.504717
Molecular Function	GO:0015267	channel activity	0.217712	0.508153
Molecular Function	GO:0022803	passive transmembrane transporter activity	0.217712	0.508153
Molecular Function	GO:0016407	acetyltransferase activity	0.221141	0.508153
Biological Process	GO:0071396	cellular response to lipid	0.257885	0.509054
Biological Process	GO:0034285	response to disaccharide	0.264893	0.511254
Biological Process	GO:0034654	nucleobase-containing compound biosynthetic process	0.266768	0.511254
Biological Process	GO:0040007	growth	0.267427	0.511254
Biological Process	GO:0009696	salicylic acid metabolic process	0.268373	0.511254
Biological Process	GO:0019751	polyol metabolic process	0.268373	0.511254
Biological Process	GO:0042537	benzene-containing compound metabolic process	0.268373	0.511254
Biological Process	GO:0006355	regulation of transcription, DNA-templated	0.269928	0.511254
Biological Process	GO:1903506	regulation of nucleic acid-templated transcription	0.269928	0.511254
Biological Process	GO:0046907	intracellular transport	0.271899	0.511254
Biological Process	GO:2001141	regulation of RNA biosynthetic process	0.272489	0.511254
Biological Process	GO:0018958	phenol-containing compound metabolic process	0.275284	0.512782
Biological Process	GO:0051649	establishment of localization in cell	0.27716	0.512782
Biological Process	GO:0033993	response to lipid	0.278715	0.512782
Biological Process	GO:0098655	cation transmembrane transport	0.278715	0.512782
Biological Process	GO:1901701	cellular response to oxygen-containing compound	0.283178	0.517569
Biological Process	GO:0051252	regulation of RNA metabolic process	0.284049	0.517569
Biological Process	GO:0051716	cellular response to stimulus	0.287628	0.518948
Biological Process	GO:0000302	response to reactive oxygen species	0.288913	0.518948
Biological Process	GO:0043269	regulation of ion transport	0.288913	0.518948
Molecular Function	GO:0016747	transferase activity, transferring acyl groups other than amino-acyl groups	0.238298	0.532159
Molecular Function	GO:0004871	signal transducer activity	0.249627	0.532159
Molecular Function	GO:0016298	lipase activity	0.254627	0.532159
Molecular Function	GO:0016682	oxidoreductase activity, acting on diphenols and related substances as donors, oxygen as acceptor	0.254627	0.532159
Molecular Function	GO:0016701	oxidoreductase activity, acting on single donors with incorporation of molecular oxygen	0.257897	0.532159
Molecular Function	GO:0016679	oxidoreductase activity, acting on diphenols and related substances as donors	0.261152	0.532159
Biological Process	GO:0048589	developmental growth	0.302289	0.538502
Biological Process	GO:0051641	cellular localization	0.302641	0.538502
Biological Process	GO:1902582	single-organism intracellular transport	0.306	0.541227
Biological Process	GO:1901135	carbohydrate derivative metabolic process	0.307295	0.541227
Biological Process	GO:0009108	coenzyme biosynthetic process	0.308884	0.541227
Biological Process	GO:0006886	intracellular protein transport	0.309885	0.541227
Biological Process	GO:0006979	response to oxidative stress	0.315418	0.54586
Biological Process	GO:0015931	nucleobase-containing compound transport	0.315418	0.54586
Biological Process	GO:1901565	organonitrogen compound catabolic process	0.318661	0.548967
Biological Process	GO:0009069	serine family amino acid metabolic process	0.32189	0.55202
Biological Process	GO:0098542	defense response to other organism	0.325104	0.552092
Biological Process	GO:0007165	signal transduction	0.326907	0.552092
Biological Process	GO:0034613	cellular protein localization	0.329334	0.552092
Biological Process	GO:0070727	cellular macromolecule localization	0.330631	0.552092
Biological Process	GO:0023052	signaling	0.330673	0.552092
Biological Process	GO:0044700	single organism signaling	0.330673	0.552092
Biological Process	GO:0065007	biological regulation	0.341139	0.565112
Biological Process	GO:0019219	regulation of nucleobase-containing compound metabolic process	0.343602	0.565112
Biological Process	GO:0009725	response to hormone	0.346196	0.565112
Biological Process	GO:2000112	regulation of cellular macromolecule biosynthetic process	0.350084	0.565112
Biological Process	GO:0009863	salicylic acid mediated signaling pathway	0.350277	0.565112
Biological Process	GO:0071446	cellular response to salicylic acid stimulus	0.350277	0.565112
Biological Process	GO:0042592	homeostatic process	0.35257	0.565112
Biological Process	GO:0000041	transition metal ion transport	0.353358	0.565112
Biological Process	GO:0009751	response to salicylic acid	0.353358	0.565112
Biological Process	GO:1901615	organic hydroxy compound metabolic process	0.354282	0.565112
Biological Process	GO:0051049	regulation of transport	0.356425	0.565112
Biological Process	GO:0044711	single-organism biosynthetic process	0.357463	0.565112
Biological Process	GO:0010556	regulation of macromolecule biosynthetic process	0.357855	0.565112
Biological Process	GO:0031326	regulation of cellular biosynthetic process	0.368199	0.577189
Biological Process	GO:0032879	regulation of localization	0.368548	0.577189
Molecular Function	GO:1901363	heterocyclic compound binding	0.297998	0.585693
Molecular Function	GO:0016791	phosphatase activity	0.298269	0.585693
Molecular Function	GO:0004674	protein serine/threonine kinase activity	0.310056	0.586498
Molecular Function	GO:0016706	oxidoreductase activity, acting on paired donors, with incorporation or reduction of molecular oxygen, 2-oxoglutarate as one donor, and incorporation of one atom each of oxygen into both donors	0.314392	0.586498
Molecular Function	GO:0019829	cation-transporting ATPase activity	0.320402	0.586498
Molecular Function	GO:0046873	metal ion transmembrane transporter activity	0.320402	0.586498
Biological Process	GO:0009124	nucleoside monophosphate biosynthetic process	0.377492	0.588764
Biological Process	GO:0031399	regulation of protein modification process	0.379764	0.589879
Molecular Function	GO:0043168	anion binding	0.330501	0.590231
Molecular Function	GO:0042625	ATPase coupled ion transmembrane transporter activity	0.343926	0.590231
Molecular Function	GO:0004721	phosphoprotein phosphatase activity	0.346809	0.590231
Molecular Function	GO:0051213	dioxygenase activity	0.361041	0.590231
Molecular Function	GO:0001883	purine nucleoside binding	0.365866	0.590231
Molecular Function	GO:0032549	ribonucleoside binding	0.365866	0.590231
Molecular Function	GO:0032550	purine ribonucleoside binding	0.365866	0.590231
Molecular Function	GO:0097159	organic cyclic compound binding	0.366162	0.590231
Molecular Function	GO:0001882	nucleoside binding	0.372398	0.591455
Biological Process	GO:0009123	nucleoside monophosphate metabolic process	0.383386	0.593075
Biological Process	GO:0018130	heterocycle biosynthetic process	0.388495	0.598535
Biological Process	GO:0008652	cellular amino acid biosynthetic process	0.396527	0.608436
Biological Process	GO:0048509	regulation of meristem development	0.400738	0.612418
Biological Process	GO:0006629	lipid metabolic process	0.402743	0.612721
Biological Process	GO:0055086	nucleobase-containing small molecule metabolic process	0.404169	0.612721
Molecular Function	GO:0097367	carbohydrate derivative binding	0.396511	0.619243
Molecular Function	GO:0003677	DNA binding	0.401361	0.619243
Biological Process	GO:0044238	primary metabolic process	0.413963	0.623176
Biological Process	GO:0071310	cellular response to organic substance	0.414354	0.623176
Molecular Function	GO:0016746	transferase activity, transferring acyl groups	0.412097	0.626852
Biological Process	GO:0060255	regulation of macromolecule metabolic process	0.418905	0.62753
Biological Process	GO:0070887	cellular response to chemical stimulus	0.420694	0.627729
Biological Process	GO:0051171	regulation of nitrogen compound metabolic process	0.424488	0.630906
Biological Process	GO:0051239	regulation of multicellular organismal process	0.42943	0.633284
Biological Process	GO:2000026	regulation of multicellular organismal development	0.42943	0.633284
Biological Process	GO:0010646	regulation of cell communication	0.431309	0.63359
Biological Process	GO:0044036	cell wall macromolecule metabolic process	0.439376	0.642948
Biological Process	GO:1901137	carbohydrate derivative biosynthetic process	0.443937	0.64574
Biological Process	GO:0015698	inorganic anion transport	0.444692	0.64574
Molecular Function	GO:0008324	cation transmembrane transporter activity	0.431789	0.647683
Biological Process	GO:0006955	immune response	0.449957	0.648418
Biological Process	GO:0045087	innate immune response	0.449957	0.648418
Molecular Function	GO:0022804	active transmembrane transporter activity	0.467226	0.673307
Molecular Function	GO:0016820	hydrolase activity, acting on acid anhydrides, catalyzing transmembrane movement of substances	0.473809	0.673307
Molecular Function	GO:0042626	ATPase activity, coupled to transmembrane movement of substances	0.473809	0.673307
Molecular Function	GO:0043492	ATPase activity, coupled to movement of substances	0.473809	0.673307
Biological Process	GO:0008610	lipid biosynthetic process	0.472344	0.6781
Biological Process	GO:0050793	regulation of developmental process	0.481624	0.688814
Molecular Function	GO:0016779	nucleotidyltransferase activity	0.494334	0.690629
Molecular Function	GO:0015077	monovalent inorganic cation transmembrane transporter activity	0.498787	0.690629
Biological Process	GO:0044237	cellular metabolic process	0.488498	0.696018
Biological Process	GO:0015031	protein transport	0.49479	0.702343
Biological Process	GO:0006066	alcohol metabolic process	0.497589	0.703163
Biological Process	GO:0044765	single-organism transport	0.499079	0.703163
Biological Process	GO:0045184	establishment of protein localization	0.50315	0.705024
Biological Process	GO:0030001	metal ion transport	0.504392	0.705024
Biological Process	GO:0044763	single-organism cellular process	0.50598	0.705024
Biological Process	GO:1902578	single-organism localization	0.50995	0.707953
Biological Process	GO:0009743	response to carbohydrate	0.516405	0.712983
Biological Process	GO:0016053	organic acid biosynthetic process	0.519217	0.712983
Biological Process	GO:0046394	carboxylic acid biosynthetic process	0.519217	0.712983
Biological Process	GO:0018205	peptidyl-lysine modification	0.525551	0.714761
Biological Process	GO:0050789	regulation of biological process	0.525842	0.714761
Biological Process	GO:0009628	response to abiotic stimulus	0.52617	0.714761
Biological Process	GO:0071407	cellular response to organic cyclic compound	0.534527	0.721061
Biological Process	GO:0045229	external encapsulating structure organization	0.538055	0.721061
Biological Process	GO:0006650	glycerophospholipid metabolic process	0.541148	0.721061
Biological Process	GO:0033036	macromolecule localization	0.545959	0.721061
Biological Process	GO:0006725	cellular aromatic compound metabolic process	0.54756	0.721061
Biological Process	GO:0071702	organic substance transport	0.547916	0.721061
Biological Process	GO:0008152	metabolic process	0.548192	0.721061
Biological Process	GO:0009639	response to red or far red light	0.549833	0.721061
Biological Process	GO:0018193	peptidyl-amino acid modification	0.549833	0.721061
Biological Process	GO:0034220	ion transmembrane transport	0.549833	0.721061
Biological Process	GO:0015672	monovalent inorganic cation transport	0.551979	0.721379
Biological Process	GO:0044271	cellular nitrogen compound biosynthetic process	0.554363	0.722006
Biological Process	GO:0046486	glycerolipid metabolic process	0.572888	0.743578
Biological Process	GO:0000902	cell morphogenesis	0.58695	0.759134
Biological Process	GO:0042743	hydrogen peroxide metabolic process	0.588921	0.759134
Biological Process	GO:0055085	transmembrane transport	0.590883	0.759134
Biological Process	GO:0000097	sulfur amino acid biosynthetic process	0.594779	0.760822
Biological Process	GO:1901360	organic cyclic compound metabolic process	0.596973	0.760822
Biological Process	GO:0044723	single-organism carbohydrate metabolic process	0.599348	0.760822
Biological Process	GO:0006644	phospholipid metabolic process	0.602461	0.760822
Biological Process	GO:0048580	regulation of post-embryonic development	0.602461	0.760822
Biological Process	GO:0005996	monosaccharide metabolic process	0.604359	0.760822
Biological Process	GO:0048468	cell development	0.606249	0.760822
Biological Process	GO:0016482	cytoplasmic transport	0.61	0.762816
Biological Process	GO:0051188	cofactor biosynthetic process	0.611863	0.762816
Biological Process	GO:0000096	sulfur amino acid metabolic process	0.619226	0.769465
Biological Process	GO:0019222	regulation of metabolic process	0.625994	0.775332
Biological Process	GO:0044283	small molecule biosynthetic process	0.628289	0.775641
Molecular Function	GO:0008168	methyltransferase activity	0.570749	0.780265
Biological Process	GO:0014070	response to organic cyclic compound	0.637037	0.783887
Biological Process	GO:0032989	cellular component morphogenesis	0.643929	0.787256
Biological Process	GO:1901293	nucleoside phosphate biosynthetic process	0.643929	0.787256
Biological Process	GO:0071705	nitrogen compound transport	0.647327	0.788385
Biological Process	GO:0072593	reactive oxygen species metabolic process	0.649014	0.788385
Biological Process	GO:0009987	cellular process	0.656381	0.794787
Biological Process	GO:0044260	cellular macromolecule metabolic process	0.669422	0.807996
Biological Process	GO:0044255	cellular lipid metabolic process	0.671792	0.808283
Biological Process	GO:0043604	amide biosynthetic process	0.67805	0.813231
Biological Process	GO:0044272	sulfur compound biosynthetic process	0.682654	0.81617
Molecular Function	GO:0048037	cofactor binding	0.607196	0.819715
Molecular Function	GO:0015075	ion transmembrane transporter activity	0.620013	0.826685
Biological Process	GO:0008104	protein localization	0.69684	0.830511
Biological Process	GO:0048507	meristem development	0.713111	0.84622
Biological Process	GO:0030154	cell differentiation	0.714487	0.84622
Molecular Function	GO:0016787	hydrolase activity	0.662047	0.85567
Molecular Function	GO:0022890	inorganic cation transmembrane transporter activity	0.66229	0.85567
Molecular Function	GO:0016853	isomerase activity	0.668248	0.85567
Molecular Function	GO:0022891	substrate-specific transmembrane transporter activity	0.673444	0.85567
Biological Process	GO:0043603	cellular amide metabolic process	0.730501	0.862492
Biological Process	GO:0009653	anatomical structure morphogenesis	0.739413	0.870302
Biological Process	GO:0006820	anion transport	0.744401	0.873461
Biological Process	GO:0090407	organophosphate biosynthetic process	0.748067	0.875054
Biological Process	GO:0006812	cation transport	0.752027	0.876979
Molecular Function	GO:0022857	transmembrane transporter activity	0.710322	0.88545
Molecular Function	GO:0042623	ATPase activity, coupled	0.71616	0.88545
Molecular Function	GO:0016887	ATPase activity	0.72366	0.88545
Molecular Function	GO:0022892	substrate-specific transporter activity	0.729677	0.88545
Molecular Function	GO:0004553	hydrolase activity, hydrolyzing O-glycosyl compounds	0.738078	0.885694
Biological Process	GO:0006732	coenzyme metabolic process	0.766764	0.891422
Biological Process	GO:0006811	ion transport	0.781567	0.904528
Biological Process	GO:1901605	alpha-amino acid metabolic process	0.783047	0.904528
Biological Process	GO:0071554	cell wall organization or biogenesis	0.787196	0.904528
Biological Process	GO:0006520	cellular amino acid metabolic process	0.787583	0.904528
Biological Process	GO:0016070	RNA metabolic process	0.790065	0.904636
Biological Process	GO:0005975	carbohydrate metabolic process	0.797277	0.906854
Biological Process	GO:0071704	organic substance metabolic process	0.797919	0.906854
Biological Process	GO:0044262	cellular carbohydrate metabolic process	0.79918	0.906854
Molecular Function	GO:0016741	transferase activity, transferring one-carbon groups	0.777033	0.909671
Molecular Function	GO:0000166	nucleotide binding	0.786802	0.909671
Molecular Function	GO:1901265	nucleoside phosphate binding	0.786802	0.909671
Molecular Function	GO:0005215	transporter activity	0.798973	0.909671
Molecular Function	GO:0001071	nucleic acid binding transcription factor activity	0.811967	0.909671
Molecular Function	GO:0016798	hydrolase activity, acting on glycosyl bonds	0.813648	0.909671
Molecular Function	GO:0043167	ion binding	0.817019	0.909671
Molecular Function	GO:0005488	binding	0.828924	0.912463
Molecular Function	GO:0016705	oxidoreductase activity, acting on paired donors, with incorporation or reduction of molecular oxygen	0.836425	0.912463
Biological Process	GO:0006790	sulfur compound metabolic process	0.806797	0.912765
Biological Process	GO:0006139	nucleobase-containing compound metabolic process	0.839258	0.944957
Biological Process	GO:0019637	organophosphate metabolic process	0.842113	0.944957
Biological Process	GO:0044281	small molecule metabolic process	0.842732	0.944957
Biological Process	GO:0009057	macromolecule catabolic process	0.853413	0.95117
Biological Process	GO:0009888	tissue development	0.855533	0.95117
Biological Process	GO:0006807	nitrogen compound metabolic process	0.858253	0.95117
Biological Process	GO:0048869	cellular developmental process	0.858311	0.95117
Molecular Function	GO:0017111	nucleoside-triphosphatase activity	0.881419	0.951559
Molecular Function	GO:0016462	pyrophosphatase activity	0.904384	0.951559
Molecular Function	GO:0016818	hydrolase activity, acting on acid anhydrides, in phosphorus-containing anhydrides	0.905086	0.951559
Molecular Function	GO:0016817	hydrolase activity, acting on acid anhydrides	0.907505	0.951559
Biological Process	GO:0009117	nucleotide metabolic process	0.861711	0.952153
Biological Process	GO:0051186	cofactor metabolic process	0.867628	0.955904
Biological Process	GO:0006753	nucleoside phosphate metabolic process	0.879313	0.964627
Biological Process	GO:0007275	multicellular organism development	0.880636	0.964627
Molecular Function	GO:0043169	cation binding	0.937752	0.973819
Biological Process	GO:1901564	organonitrogen compound metabolic process	0.891684	0.973915
Biological Process	GO:0034645	cellular macromolecule biosynthetic process	0.907228	0.976727
Biological Process	GO:0009058	biosynthetic process	0.907481	0.976727
Biological Process	GO:0044249	cellular biosynthetic process	0.907727	0.976727
Biological Process	GO:0046483	heterocycle metabolic process	0.912277	0.976727
Biological Process	GO:1901576	organic substance biosynthetic process	0.912935	0.976727
Biological Process	GO:1901566	organonitrogen compound biosynthetic process	0.913552	0.976727
Biological Process	GO:0010468	regulation of gene expression	0.914178	0.976727
Biological Process	GO:1901575	organic substance catabolic process	0.921075	0.976727
Biological Process	GO:0005976	polysaccharide metabolic process	0.922606	0.976727
Biological Process	GO:0043170	macromolecule metabolic process	0.923412	0.976727
Biological Process	GO:0044707	single-multicellular organism process	0.924189	0.976727
Biological Process	GO:0032501	multicellular organismal process	0.926334	0.976727
Biological Process	GO:0009059	macromolecule biosynthetic process	0.929511	0.976727
Biological Process	GO:0009791	post-embryonic development	0.931867	0.976727
Biological Process	GO:0009056	catabolic process	0.93449	0.976727
Biological Process	GO:0034641	cellular nitrogen compound metabolic process	0.935493	0.976727
Biological Process	GO:0032502	developmental process	0.942757	0.981599
Biological Process	GO:0090304	nucleic acid metabolic process	0.947439	0.981599
Biological Process	GO:0044767	single-organism developmental process	0.947929	0.981599
Biological Process	GO:0019752	carboxylic acid metabolic process	0.95549	0.984774
Biological Process	GO:0043436	oxoacid metabolic process	0.961741	0.984774
Biological Process	GO:0006082	organic acid metabolic process	0.961887	0.984774
Biological Process	GO:0003006	developmental process involved in reproduction	0.962091	0.984774
Biological Process	GO:0048856	anatomical structure development	0.963987	0.984774
Biological Process	GO:0032787	monocarboxylic acid metabolic process	0.970703	0.988422
Biological Process	GO:0022414	reproductive process	0.973997	0.988422
Biological Process	GO:0000003	reproduction	0.975382	0.988422
Molecular Function	GO:0003676	nucleic acid binding	0.962842	0.990352
Biological Process	GO:0016043	cellular component organization	0.983949	0.994444
Biological Process	GO:0071840	cellular component organization or biogenesis	0.989692	0.997589
Cellular Component	GO:0044425	membrane part	0.0871073	1
Cellular Component	GO:0031224	intrinsic component of membrane	0.103692	1
Cellular Component	GO:0009521	photosystem	0.344194	1
Cellular Component	GO:0031976	plastid thylakoid	0.357532	1
Cellular Component	GO:0019866	organelle inner membrane	0.365036	1
Cellular Component	GO:0034357	photosynthetic membrane	0.396002	1
Cellular Component	GO:0005576	extracellular region	0.42041	1
Cellular Component	GO:0044436	thylakoid part	0.456862	1
Cellular Component	GO:0031984	organelle subcompartment	0.541357	1
Cellular Component	GO:0009579	thylakoid	0.576829	1
Cellular Component	GO:0098796	membrane protein complex	0.590512	1
Cellular Component	GO:0044434	chloroplast part	0.69505	1
Cellular Component	GO:0009507	chloroplast	0.725753	1
Cellular Component	GO:0031967	organelle envelope	0.794858	1
Cellular Component	GO:0031975	envelope	0.794858	1
Cellular Component	GO:0031090	organelle membrane	0.903598	1
Cellular Component	GO:0043234	protein complex	0.930141	1
Cellular Component	GO:0044435	plastid part	0.944073	1
Cellular Component	GO:0044446	intracellular organelle part	0.975743	1
Molecular Function	GO:0046914	transition metal ion binding	0.990328	1
Cellular Component	GO:0044422	organelle part	0.991678	1
Cellular Component	GO:0032991	macromolecular complex	0.994596	1
Cellular Component	GO:0009536	plastid	0.995479	1
Biological Process	GO:0010467	gene expression	0.996597	1
Biological Process	GO:0006996	organelle organization	0.99761	1
Molecular Function	GO:0046872	metal ion binding	0.998292	1
Cellular Component	GO:0044444	cytoplasmic part	0.999912	1
Cellular Component	GO:0005737	cytoplasm	0.999918	1
Cellular Component	GO:0043227	membrane-bounded organelle	0.999953	1
Cellular Component	GO:0043229	intracellular organelle	0.999988	1
Cellular Component	GO:0043231	intracellular membrane-bounded organelle	0.99999	1
Cellular Component	GO:0005623	cell	0.99999	1
Cellular Component	GO:0044464	cell part	0.99999	1
Cellular Component	GO:0043226	organelle	0.999993	1
Cellular Component	GO:0044424	intracellular part	1	1
Cellular Component	GO:0005622	intracellular	1	1
Molecular Function	GO:0003674	molecular_function	1	1
Cellular Component	GO:0005575	cellular_component	1	1
Biological Process	GO:0008150	biological_process	1	1

## Sheet: Table S4
Table S4. Genes in the ‘magenta’ module
GeneID	module	Connectivity (Total)	Connectivity (Within)	T0-A-1	T0-A-2	T0-A-3	T0-C-1	T0-C-2	T0-C-3	T2-LN-A-1	T2-LN-A-2	T2-LN-A-3	T2-LN-C-1	T2-LN-C-2	T2-LN-C-3	T4-LN-A-1	T4-LN-A-2	T4-LN-A-3	T4-LN-C-1	T4-LN-C-2	T4-LN-C-3	T6-LN-A-1	T6-LN-A-2	T6-LN-A-3	T6-LN-C-1	T6-LN-C-2	T6-LN-C-3	Symbol	Description	KEGG_A_class	KEGG_B_class	Pathway	K_ID	GO Component	GO Function
Podel.19G035300 (hub gene)	magenta	399.014	38.6837	44.06	32.7	46.45	63.55	67.02	61.86	54.91	53.99	49.46	58.4	57.81	38	124.03	96.41	102.68	75.03	84.97	95	130.11	111.53	113.14	93.02	77.34	94.04	--	Echinoderm microtubule-associated protein-like 6 [Gossypium arboreum]	-	-	-	-	-	-
Podel.02G021400 (hub gene)	magenta	378.529	37.3305	1.03	1.01	0.77	2.43	1.4	1.11	1.13	0.74	0.88	1.09	0.71	0.63	3.55	2.9	2.61	1.1	1.95	2.21	3.77	3.11	3.83	2.46	1.96	2.94	--	DUF668 domain-containing protein/DUF3475 domain-containing protein, partial [Cephalotus follicularis]	-	-	-	-	-	-
Podel.19G001200 (hub gene)	magenta	489.193	36.3912	6.97	4.88	5.13	8.34	9.96	8.2	4.54	4.19	3.17	6.31	4.7	3.47	17.27	10.37	12.22	7.6	10.42	10.34	18.88	17.88	15.67	12.65	7.21	12.12	At4g24290	PREDICTED: MACPF domain-containing protein At4g24290-like [Populus euphratica]	-	-	-	-	-	-
Podel.08G129500 (hub gene)	magenta	439.651	36.1866	5.79	5.58	5.21	10.05	8.49	5.37	4.69	4.35	4.08	5.42	6.04	3.37	14.9	10.23	11.26	6.89	9.63	10.23	14.94	13.6	14.57	10.47	6.13	12.82	ACR4	PREDICTED: ACT domain-containing protein ACR4 isoform X1 [Jatropha curcas]	-	-	-	-	-	GO:0016772//transferase activity, transferring phosphorus-containing groups;GO:0031406//carboxylic acid binding
Podel.03G215800 (hub gene)	magenta	371.792	35.7645	1.18	0.78	1.42	2.83	4.01	1.96	1.3	1.12	1.01	1.78	1.16	1.23	6.72	2.9	4.9	2.1	4.79	3.98	7.64	4.96	7.8	4.45	4.34	4.87	ABCC3	PREDICTED: ABC transporter C family member 3-like, partial [Populus euphratica]	Environmental Information Processing	Membrane transport	ko02010//ABC transporters	K05666	-	-
Podel.03G153500 (hub gene)	magenta	531.895	35.331	69.29	64.3	69.34	119.6	115.43	80.66	55.36	42.53	41.86	68.41	71.37	50.26	185.03	102.85	154.04	92.87	103.24	118.28	186.3	159.79	176.04	158.66	81.17	116.63	--	PREDICTED: probable serine/threonine-protein kinase clkA [Populus euphratica]	-	-	-	-	-	-
Podel.10G040100 (hub gene)	magenta	475.197	34.9481	7.81	5.91	6.39	10.63	10.37	7.86	7.13	4.7	6.47	8.71	7.55	6.11	16.18	11.17	15.61	10.02	10.86	12.5	16.64	16.4	18.14	15.05	6.66	11.54	PIRL2	PREDICTED: plant intracellular Ras-group-related LRR protein 3-like [Populus euphratica]	-	-	-	-	-	GO:0003824//catalytic activity
Podel.06G003100 (hub gene)	magenta	328.035	34.9313	1.79	1.51	1.64	2.68	3.29	2.66	1.56	1.14	1.6	2.2	2.18	1.8	3.76	3.25	3.58	2.43	2.87	3.5	4.18	3.97	5.11	3.74	2.77	4.2	At1g03370	PREDICTED: C2 and GRAM domain-containing protein At1g03370-like [Populus euphratica]	-	-	-	-	GO:0031224//intrinsic component of membrane	-
Podel.04G076900 (hub gene)	magenta	280.925	34.6069	13.97	12.92	14.87	20.31	18.58	18.81	15.57	17.25	13.97	19.33	17.54	17.09	39.07	26.86	32.04	20.12	29.66	24.73	35.31	40.57	35.36	30.01	34.4	31	UGT88A1	UDP-glucoronosyl/UDP-glucosyl transferase family protein [Populus trichocarpa]	Metabolism;Metabolism	Global and overview maps;Biosynthesis of other secondary metabolites	ko01110//Biosynthesis of secondary metabolites;ko00941//Flavonoid biosynthesis	K22845;K22845	-	GO:0035251//UDP-glucosyltransferase activity
Podel.05G137500 (hub gene)	magenta	342.731	34.3372	12.6	12.43	15.76	16.92	13.67	12.59	15.25	11.6	12.85	16.85	16.14	10.74	30.34	21.92	27.72	18.26	20.84	21.19	35.83	26.99	36.23	26.35	19.19	25.47	PDR17	PREDICTED: random slug protein 5-like [Populus euphratica]	-	-	-	-	GO:0044464//cell part	-
Podel.18G019200	magenta	342.538	34.2201	1.83	1.62	2.86	8.92	4.3	3.2	2.86	2.73	3.69	8.12	4.44	4.52	17.81	12.28	14.33	9.33	12.73	11.82	17.29	21.23	20.77	7.94	7.94	13.51	WRKY18	PREDICTED: probable WRKY transcription factor 40 [Populus euphratica]	-	-	-	-	-	-
Podel.06G225900	magenta	454.35	33.2457	6.45	4.86	6.45	8.65	9.8	8.29	5.33	5.24	5.11	6.74	6.88	6.06	11.74	10.37	9.8	9.21	9.99	9.59	11.75	11.72	12.2	9.55	7.62	9.1	At5g02620	PREDICTED: ankyrin repeat-containing protein At5g02620 [Populus euphratica]	-	-	-	-	-	-
Podel.07G111000	magenta	310.832	33.0188	24.97	21.99	23.34	13.46	13.79	20.77	21.87	23.05	17.82	22.92	25.44	15.75	3.89	9.86	8.28	13.5	10.72	9.64	2.56	2.5	4.08	9.19	13.68	10.17	GA20OX2	gibberellin 20-oxidase family protein [Populus trichocarpa]	-	-	-	-	-	GO:0016706//oxidoreductase activity, acting on paired donors, with incorporation or reduction of molecular oxygen, 2-oxoglutarate as one donor, and incorporation of one atom each of oxygen into both donors;GO:0043169//cation binding
Podel.07G058600	magenta	320.563	32.7626	2.42	1.85	2.35	4.63	4.44	3	2.79	2.63	2.52	3.73	3.11	2.61	6.52	4.47	5.34	3.55	4.24	4.99	6.44	4.37	7.24	5.25	5.08	5.32	At4g33920	PREDICTED: probable protein phosphatase 2C 63 [Populus euphratica]	-	-	-	-	-	GO:0004721//phosphoprotein phosphatase activity;GO:0043169//cation binding
Podel.10G050300	magenta	450.203	31.9854	1.33	1.8	1.05	6.87	3.66	2.25	1.82	1.34	1.27	3.75	3.41	1.35	10.03	6.14	7.04	4.93	6.52	7.13	10.39	9.08	8.75	5.23	3.16	4.7	BAHD1	PREDICTED: BAHD acyltransferase At5g47980-like [Populus euphratica]	-	-	-	-	-	GO:0016747//transferase activity, transferring acyl groups other than amino-acyl groups
Podel.06G093200	magenta	348.738	31.8829	1.12	1.57	1.24	3.85	2.57	2.22	1.86	1.67	1.04	2.07	1.33	1.94	4.21	2.97	3.27	1.43	2.92	3.19	5.61	4.28	5.15	3.34	2.62	3.62	RBL1	PREDICTED: rhomboid-like protease 2 [Populus euphratica]	-	-	-	-	GO:0031224//intrinsic component of membrane	-
Podel.07G092100	magenta	318.861	31.8378	2	1.29	1.29	2.63	3.75	2.7	2	1.6	1.4	2.27	2.02	1.78	6.6	3.81	4.72	1.88	4.91	3.63	6.83	5.04	6.39	4.31	5.37	4.05	SERK2	PREDICTED: somatic embryogenesis receptor kinase 2-like isoform X1 [Populus euphratica]	-	-	-	-	GO:0031224//intrinsic component of membrane	GO:0004672//protein kinase activity;GO:0032550//purine ribonucleoside binding
Podel.10G001600	magenta	286.304	31.0109	4.84	3.81	4.4	11.28	10.29	8.58	5.16	3.69	3.97	10.81	8.24	5.9	16.27	11.19	13.55	12.61	15.73	15.06	16.63	14.07	17.7	17.9	10.36	13.1	PTI1	PREDICTED: pto-interacting protein 1 isoform X2 [Populus euphratica]	Organismal Systems	Environmental adaptation	ko04626//Plant-pathogen interaction	K13436	-	GO:0004672//protein kinase activity;GO:0032550//purine ribonucleoside binding
Podel.10G095000	magenta	333.057	30.5658	1.73	1.12	1.63	2.01	2.47	1.91	1.33	1.3	1.36	1.78	1.61	1.17	3.57	2.42	2.35	1.79	2.49	2.07	2.87	2.88	3.2	2.43	2.42	3.01	AKR4C9	PREDICTED: alcohol dehydrogenase [NADP(+)]-like [Populus euphratica]	Metabolism;Metabolism;Metabolism;Metabolism;Metabolism	Global and overview maps;Global and overview maps;Carbohydrate metabolism;Carbohydrate metabolism;Lipid metabolism	ko01100//Metabolic pathways;ko01110//Biosynthesis of secondary metabolites;ko00010//Glycolysis / Gluconeogenesis;ko00040//Pentose and glucuronate interconversions;ko00561//Glycerolipid metabolism	K00002;K00002;K00002;K00002;K00002	GO:0044424//intracellular part	GO:0016701//oxidoreductase activity, acting on single donors with incorporation of molecular oxygen
Podel.03G147900	magenta	320.449	30.4241	0.19	0.26	0.37	1.11	0.83	0.69	0.61	0.36	0.48	0.67	0.66	0.37	1.38	0.74	1.62	0.96	1.32	1.11	2.11	1.64	1.58	1.54	0.7	1.33	PHY1	PREDICTED: mitogen-activated protein kinase kinase kinase 7-like [Populus euphratica]	-	-	-	-	-	GO:0004713//protein tyrosine kinase activity;GO:0032550//purine ribonucleoside binding
Podel.04G117800	magenta	399.269	30.4089	17.08	19.13	20.99	7.68	10.64	14.12	15.29	17.65	18.31	13.3	12.55	15.11	5.72	9.02	5.47	9.32	10.51	8.7	3.47	2.72	3.57	6.65	11.59	13.41	NIK1	PREDICTED: protein NSP-INTERACTING KINASE 1-like isoform X2 [Populus euphratica]	-	-	-	-	GO:0031224//intrinsic component of membrane	GO:0004672//protein kinase activity;GO:0016628//oxidoreductase activity, acting on the CH-CH group of donors, NAD or NADP as acceptor;GO:0032550//purine ribonucleoside binding
Podel.03G179200	magenta	377.286	30.1857	1.09	0.59	1.01	2.4	3.41	1.55	0.67	0.79	0.44	2.27	1.71	1.15	7.97	3.2	3.95	2.94	6.43	4.35	8.4	7.98	7.42	5	2.17	2.85	--	PREDICTED: auxin-responsive protein SAUR32-like [Juglans regia]	Environmental Information Processing	Signal transduction	ko04075//Plant hormone signal transduction	K14488	-	-
Podel.04G025600	magenta	223.384	30.1578	1.08	0.99	1.17	1.98	1.47	1.83	0.96	0.54	1.16	1.83	1.68	1.69	2.46	2.22	2.3	1.92	2.23	2.11	3	2.42	3.2	2.41	2.3	2.63	CRK25	cysteine-rich receptor-like protein kinase 10 [Populus tomentosa]	-	-	-	-	-	GO:0004674//protein serine/threonine kinase activity;GO:0036094//small molecule binding;GO:0097159//organic cyclic compound binding;GO:1901363//heterocyclic compound binding
Podel.01G324300	magenta	361.741	29.6876	0.74	0.48	0.57	0.92	1.17	0.56	0.4	0.72	0.45	0.58	0.67	0.5	1.52	1.13	1.52	0.63	1.23	1.11	1.5	1.96	2.16	1.21	1.03	1.09	At4g24290	PREDICTED: MACPF domain-containing protein At4g24290-like [Populus euphratica]	-	-	-	-	-	-
Podel.01G321600	magenta	415.955	28.8654	2.07	1.37	1.74	5.09	3.22	3.38	1.88	1.4	1.74	2.73	2.84	1.91	9.02	4.24	6.06	2.62	4.14	3.18	6.94	7.28	6.33	3.62	4.11	5.82	TOGT1	PREDICTED: scopoletin glucosyltransferase-like [Populus euphratica]	-	-	-	-	-	GO:0035251//UDP-glucosyltransferase activity
Podel.18G143000	magenta	266.61	28.6687	1.08	0.54	0.65	1.25	1.18	0.78	1.17	1.15	0.58	1.33	1.14	1.07	2.36	2.22	2.4	1.17	2.19	1.95	2.62	2.41	2.92	1.64	1.09	2.31	RPP8L2	disease resistance protein (CC-NBS-LRR class) family protein [Medicago truncatula]	-	-	-	-	-	GO:0003824//catalytic activity;GO:0032550//purine ribonucleoside binding
Podel.16G115200	magenta	469.821	28.5317	110.04	80.18	91.03	108.48	111.1	82.71	65.32	53.54	61.74	64.59	50.25	48.18	219.41	124.29	200.11	103.11	108.54	117.19	219.36	181.53	199.19	156.42	112.88	127.74	At3g10130	SOUL heme-binding family protein [Populus trichocarpa]	-	-	-	-	-	-
Podel.08G227300	magenta	247.254	28.4767	0.77	0.79	0.92	3.17	2.77	2.29	1.42	0.77	1.01	2.11	1.53	0.71	5.16	3.39	3.93	1.21	3.22	3.45	5.56	7.33	5.99	2.53	5.02	5.8	--	inosine-uridine preferring nucleoside hydrolase-related family protein [Populus trichocarpa]	-	-	-	-	-	GO:0003824//catalytic activity
Podel.11G148300	magenta	268.525	28.4294	4.6	2.8	3.95	4.53	5.63	4.02	5.13	4.06	3.59	4.34	3.29	4.32	8.66	8.81	8.78	5.52	8.15	6.08	9.79	9.36	12.18	5.53	6.57	8.07	SBT3.6	subtilase family protein [Populus trichocarpa]	-	-	-	-	-	-
Podel.01G399700	magenta	350.342	28.3985	0.86	0.71	0.48	2.3	2.3	0.97	0.78	0.73	0.78	1.36	1.6	0.67	4.81	2.3	3.29	1.59	1.45	3.11	2.83	5.01	4.12	3.63	1.32	2.77	GLR2.7	PREDICTED: glutamate receptor 2.7-like [Populus euphratica]	-	-	-	-	GO:0016020//membrane	-
Podel.11G056900	magenta	218.949	28.2098	1.06	0.96	1.15	1.38	1.23	1	0.95	0.95	0.82	2.11	1.64	0.98	3.84	1.91	2.19	1.47	1.69	2.5	3.02	3.83	3.8	3.52	2	3.35	GLR2.9	PREDICTED: glutamate receptor 2.5-like [Populus euphratica]	-	-	-	-	-	-
Podel.03G226000	magenta	294.966	27.97	1.18	1.46	2.37	1.81	2.43	2.17	1.72	2.15	1.65	2.46	1.53	1.73	5.02	3.36	3.94	3.62	3.28	3.99	5.86	4.95	7.36	3.93	3	3.11	--	BnaA02g21550D [Brassica napus]	-	-	-	-	-	-
Podel.01G399900	magenta	317.072	27.8542	0.69	1.58	0.63	6.54	6.72	4.03	0.64	0.73	0.64	2.39	2.62	0.78	14.42	3.79	7.17	1.73	8.4	5.23	12.55	16.34	9.37	8.12	6.41	10.73	GLR2.7	PREDICTED: glutamate receptor 2.7-like [Populus euphratica]	-	-	-	-	GO:0016020//membrane	-
Podel.18G088500	magenta	299.356	27.6734	0.45	0.24	0.37	0.85	0.2	0.36	0.68	0.3	0.45	0.65	0.46	0.6	2.1	1.3	1.53	0.72	0.65	0.68	2.14	1.8	2.83	1.43	1	1.24	RLK5	PREDICTED: receptor-like protein kinase 5 [Populus euphratica]	-	-	-	-	GO:0016020//membrane	GO:0004672//protein kinase activity
Podel.05G141700	magenta	291.447	27.6169	1.44	1.12	1.35	1.34	1.78	1.22	1.23	0.94	1.06	1.43	0.85	1.12	2.68	2.05	1.88	1.5	1.92	2.42	2.35	2.22	2.64	2.33	1.47	1.95	LYK4	PREDICTED: lysM domain receptor-like kinase 4 [Populus euphratica]	-	-	-	-	GO:0031224//intrinsic component of membrane	GO:0004713//protein tyrosine kinase activity;GO:0032550//purine ribonucleoside binding
Podel.08G183600	magenta	258.246	27.4483	32.83	21.32	24.66	38.52	34.4	33.26	28.56	26.05	24.65	28.9	33.3	30.97	89.22	50.1	43.26	26.43	50.82	46.1	77.43	83.89	97.6	42.99	51.71	76.93	APS1	ATP sulfurylase family protein [Populus trichocarpa]	Metabolism;Metabolism;Metabolism;Metabolism;Metabolism	Global and overview maps;Nucleotide metabolism;Energy metabolism;Metabolism of other amino acids;Biosynthesis of other secondary metabolites	ko01100//Metabolic pathways;ko00230//Purine metabolism;ko00920//Sulfur metabolism;ko00450//Selenocompound metabolism;ko00261//Monobactam biosynthesis	K13811;K13811;K13811;K13811;K13811	-	GO:0004779//sulfate adenylyltransferase activity
Podel.02G228100	magenta	328.738	26.8874	26.25	23.85	28.72	25.18	27.33	21.68	25.12	21.4	21.18	16.8	15.33	15.02	52.47	38.58	52.29	24.95	27.31	39.74	48.41	51.21	60.36	41.33	34.12	38.87	ABCC14	glutathione-conjugate transporter family protein [Populus trichocarpa]	Environmental Information Processing	Membrane transport	ko02010//ABC transporters	K05666	GO:0031224//intrinsic component of membrane	GO:0015405//P-P-bond-hydrolysis-driven transmembrane transporter activity;GO:0016628//oxidoreductase activity, acting on the CH-CH group of donors, NAD or NADP as acceptor;GO:0017111//nucleoside-triphosphatase activity;GO:0032550//purine ribonucleoside binding
Podel.09G160900	magenta	223.366	26.2543	0.61	0.34	0.44	1.56	1.87	0.76	1	0.83	0.38	0.56	0.57	0.65	4.18	2.31	3.27	1.01	3.34	2.04	5.62	2.23	5.94	2.5	3.17	4.03	WAK2	PREDICTED: wall-associated receptor kinase 2-like isoform X1 [Populus euphratica]	-	-	-	-	-	GO:0004672//protein kinase activity;GO:0043167//ion binding
Podel.05G149900	magenta	408.745	25.8813	15.86	14.2	15.07	9.96	10.75	14.09	10.4	14.35	18.22	10.4	17.39	17.14	4.39	10.14	5.65	12.25	11.33	7.81	2.68	2.25	2.97	9.74	12.9	10.96	--	Voltage-dependent L-type calcium channel subunit alpha-1S [Gossypium arboreum]	-	-	-	-	-	-
Podel.11G162500	magenta	353.779	25.6758	5.76	3.85	4.61	9.96	9.89	5.94	4.51	2.82	3.5	10.91	8.05	5.47	16.57	7.58	15.16	13.11	9.73	13.34	15.91	17.64	16.53	17.54	6.81	9.45	FER	Pto-like kinase OGw family protein [Populus trichocarpa]	-	-	-	-	-	GO:0004672//protein kinase activity
Podel.10G125700	magenta	309.512	25.1529	83.35	42.73	73.82	96.29	118.53	125.82	67.29	47.3	52.64	92.98	87.04	84.72	137.99	118.66	174.65	125.6	116.64	131.3	166.47	174.13	160.14	138.37	140.61	115.98	NPF3.1	PREDICTED: protein NRT1/ PTR FAMILY 3.1 [Populus euphratica]	-	-	-	-	-	-
Podel.14G033100	magenta	261.443	25.1438	0.03	0.18	0.17	0.24	0.4	0.08	0.25	0.28	0.24	0.24	0.11	0.21	1.24	0.63	0.95	0.2	0.42	0.55	0.69	1.04	0.98	1.01	0.37	0.7	GLR2.5	PREDICTED: glutamate receptor 2.7-like [Populus euphratica]	-	-	-	-	GO:0016020//membrane	-
Podel.12G083500	magenta	283.124	24.8321	11.57	11.71	11.06	3.1	5.03	7.94	7.31	8.87	9.93	5.44	11.44	8.74	2.33	5.65	3.27	4.19	4.59	2.64	1.27	1.52	1.92	5.25	3.77	5.14	WER	PREDICTED: transcription factor WER-like [Populus euphratica]	Organismal Systems	Environmental adaptation	ko04626//Plant-pathogen interaction	K09422	-	-
Podel.02G008600	magenta	163.783	24.827	2.9	3.01	3.62	4.79	3.43	4.92	3.27	2.62	3.07	4.06	4.28	4.73	6.14	6.11	7.01	3.66	5.35	5.89	8.55	6.25	7.06	7.83	6.19	6.53	PIX13	PREDICTED: probable serine/threonine-protein kinase NAK [Populus euphratica]	-	-	-	-	-	GO:0004702//receptor signaling protein serine/threonine kinase activity;GO:0032550//purine ribonucleoside binding
Podel.08G009700	magenta	275.871	24.411	91.51	110.33	104.62	36.04	33.78	73.45	71.59	93.65	83.15	40	60.68	72.8	24.7	50.08	38.65	38.37	37.42	42.56	15.68	8.79	16.69	25.65	40.28	58.69	RD22	embryonic abundant family protein [Populus trichocarpa]	-	-	-	-	-	-
Podel.16G121400	magenta	265.865	24.3712	22.19	21.26	17.34	11.65	12.52	14.35	20.87	19.39	25.44	18.89	20.08	14.37	8.68	12.9	10.33	11.73	10.32	10.76	5.26	8.99	9.49	8.8	12.32	12.8	CPRD49	CPRD49 family protein [Populus trichocarpa]	-	-	-	-	-	GO:0016787//hydrolase activity
Podel.09G066800	magenta	251.208	23.8027	1.57	2.26	2.32	4.21	2.52	1.15	1.93	1.96	1.99	1.73	1.71	1.37	6.46	4.3	4.24	1.89	1.97	3.14	4.57	6.97	6.26	5.97	3.32	3.97	CYP705A5	PREDICTED: cytochrome P450 705A5-like [Populus euphratica]	-	-	-	-	-	GO:0005488//binding
Podel.10G081700	magenta	214.751	23.8013	2.01	1.23	1.6	0.53	0.72	1.27	0.94	1.64	1.18	0.95	1.43	1.15	0.17	0.38	0.49	0.76	0.57	0.73	0.28	0.08	0.24	0.28	0.66	0.89	--	DUF1677 domain-containing protein [Cephalotus follicularis]	-	-	-	-	-	-
Podel.06G075400	magenta	234.276	23.7445	8.91	8.27	10.36	8.89	10.83	10.43	9.39	9.97	10.86	9.78	11.34	10.32	3.88	5.95	5.86	11.99	5.78	7.43	1.8	1.99	2.24	6.5	6.21	6.38	DBR	PREDICTED: 2-alkenal reductase (NADP(+)-dependent)-like [Populus euphratica]	-	-	-	-	-	GO:0003824//catalytic activity
Podel.12G037800	magenta	270.599	23.7074	4.2	2.32	4.24	3.48	4.22	4.01	3.55	3.76	2.64	3.52	2.71	3.1	10.37	7.46	8.26	3.26	7.75	5.2	10.7	9.73	7.29	5.28	5.52	8.27	MAKR5	PREDICTED: probable membrane-associated kinase regulator 5 isoform X2 [Populus euphratica]	-	-	-	-	-	-
Podel.02G115300	magenta	291.508	23.3706	2.15	1.13	1	2.93	3.15	2.28	1.23	0.9	1.22	2.87	1.46	1.77	3.61	3.54	2.83	2.95	2.39	3.21	4.43	4.04	3.87	4.6	2.73	2.38	BHLH30	PREDICTED: transcription factor bHLH30-like [Populus euphratica]	-	-	-	-	-	-
Podel.03G165300	magenta	383.745	23.0433	4.53	2.64	3.88	4.9	5.59	6.44	2.62	2.78	2.61	2.67	2.74	1.98	12.36	7.76	12.89	2.87	9.3	6.85	15.31	14.09	11.59	4.56	4.71	7.66	--	hypothetical protein POPTR_0003s15230g [Populus trichocarpa]	-	-	-	-	-	-
Podel.01G383200	magenta	298.165	22.7882	6.46	5.42	5.52	6.58	7.52	5.87	4.03	4.18	4.73	5.16	7.1	5.58	10.87	7.71	7.49	6.55	8.54	7.96	10.96	8.18	9.49	9.21	6.41	7.17	--	LBP_BPI_CETP domain-containing protein/LBP_BPI_CETP_C domain-containing protein [Cephalotus follicularis]	-	-	-	-	-	-
Podel.06G265700	magenta	197.111	22.4346	3.4	3.53	4.14	5.48	4.83	6.45	3.05	3.34	4.2	3.58	3.77	2.4	8.7	7.87	6.45	4.77	4.56	4.51	8.9	7.79	8.68	10.1	5.34	7.32	HY5	bZIP with a Ring-finger motif family protein [Populus trichocarpa]	Organismal Systems	Environmental adaptation	ko04712//Circadian rhythm - plant	K16241	GO:0043231//intracellular membrane-bounded organelle	GO:0001071//nucleic acid binding transcription factor activity;GO:0043566//structure-specific DNA binding
Podel.03G178900	magenta	284.827	22.4119	6.16	7.11	5.68	1.87	0.91	5.25	3.88	6.55	4.3	3.92	6.81	4.08	0.21	1.59	0.25	1.15	1.87	1.01	0.08	0.21	0.2	2.44	2.15	2.38	--	PREDICTED: sulfated surface glycoprotein 185-like [Populus euphratica]	-	-	-	-	-	-
Podel.12G073000	magenta	218.354	22.3718	8.35	8.8	6.12	24.31	16.5	19.45	7.65	5.47	7.09	22.83	24.56	16.64	43.31	23.57	28.15	22.9	20.76	32.92	31.7	35.7	35.94	46.2	15.67	25.01	ABCA2	PREDICTED: ABC transporter A family member 2-like [Populus euphratica]	-	-	-	-	GO:0031224//intrinsic component of membrane	GO:0019829//cation-transporting ATPase activity;GO:0032550//purine ribonucleoside binding
Podel.10G111800	magenta	200.071	22.1317	0.67	0.63	0.55	0.83	0.9	2.03	1.05	0.73	0.76	0.55	0.61	0.84	2.59	2.89	2.2	1.43	1.25	1.61	3.92	2.7	4.79	2.96	1.69	1.97	dnaJ	PREDICTED: dnaJ homolog subfamily B member 7-like [Populus euphratica]	-	-	-	-	-	-
Podel.08G051900	magenta	201.999	21.8876	0.32	0.55	0.9	7.43	1.76	1.18	1.97	0.95	0.91	3.05	1.73	0.86	5.32	3.91	3.48	3.08	3.61	4.26	7.05	4.91	6.52	5.3	2.77	5.12	LBD1	PREDICTED: LOB domain-containing protein 1-like [Populus euphratica]	-	-	-	-	-	-
Podel.11G151500	magenta	199.215	21.8575	39.42	45.7	49.5	36.02	39.82	47.78	65.43	59.04	64.62	63.63	82.27	52.83	143.63	131.59	111.25	68.27	106.19	112.31	152.38	170.81	140.3	109.65	108.81	89.61	ACR10	ACT domain-containing family protein [Populus trichocarpa]	-	-	-	-	-	GO:0031406//carboxylic acid binding
Podel.08G198900	magenta	259.896	21.4807	5.61	7.3	10.73	23.51	16.52	20.36	10.45	7.17	7.69	12.54	14.38	11.09	44	11.18	28.64	10.09	18.97	17.16	26.24	31.01	36.79	23.22	29.06	26.97	PRP1	PREDICTED: probable glutathione S-transferase [Populus euphratica]	Metabolism	Metabolism of other amino acids	ko00480//Glutathione metabolism	K00799	-	-
Podel.19G095900	magenta	180.822	21.2479	0.4	0.33	0.5	0.97	0.88	1.01	0.43	0.3	0.24	0.61	0.78	0.71	2.36	2.25	1.07	0.6	0.39	1.35	1.44	2.18	2.58	1.85	1.26	1.56	ATL41	PREDICTED: E3 ubiquitin-protein ligase ATL41-like [Populus euphratica]	-	-	-	-	-	-
Podel.09G161300	magenta	135.446	21.1192	0.35	0.28	0.24	1.48	1.21	0.32	0.69	0.63	0.59	0.82	0.51	0.8	2.92	1.71	2.16	0.98	1.87	1.8	3.33	1.26	2.93	3.88	2.26	2.72	WAK2	PREDICTED: wall-associated receptor kinase 2-like isoform X1 [Populus euphratica]	-	-	-	-	-	-
Podel.01G112800	magenta	275.627	21.1153	0	0.22	0.08	0.57	0.13	0.07	0.19	0.03	0.16	0.13	0.3	0.04	0.66	0.62	0.52	0.17	0.39	0.27	0.69	0.8	0.73	0.38	0.14	0.36	ASAT1	PREDICTED: probable long-chain-alcohol O-fatty-acyltransferase 5 [Populus euphratica]	-	-	-	-	-	-
Podel.09G124300	magenta	164.085	20.8687	10.38	13.84	8.29	6.31	5.4	7.71	9.62	10.26	13.88	6.06	6.75	8.95	3.35	4.65	4.97	3.3	3.65	2.72	1.75	2.84	2.68	2.22	1.96	3.04	THY-1	PREDICTED: bifunctional dihydrofolate reductase-thymidylate synthase 1-like isoform X2 [Populus euphratica]	Metabolism;Metabolism;Metabolism;Metabolism	Global and overview maps;Nucleotide metabolism;Metabolism of cofactors and vitamins;Metabolism of cofactors and vitamins	ko01100//Metabolic pathways;ko00240//Pyrimidine metabolism;ko00790//Folate biosynthesis;ko00670//One carbon pool by folate	K13998;K13998;K13998;K13998	-	GO:0000166//nucleotide binding;GO:0042083//5,10-methylenetetrahydrofolate-dependent methyltransferase activity
Podel.12G042700	magenta	216.566	20.7939	1.91	1.5	1.02	0.81	0.84	0.74	1.57	1.34	1.61	1.36	2.43	1.28	0.15	0.6	0.46	0.84	0.43	0.7	0.16	0.29	0	0.49	0.62	0.59	ZHD4	PREDICTED: zinc-finger homeodomain protein 1-like [Populus euphratica]	-	-	-	-	-	-
Podel.14G024900	magenta	243.835	20.7497	0.09	0.06	0.06	0.2	0.36	0.09	0.15	0.09	0.26	0.36	0.3	0.14	0.62	0.84	0.66	0.29	0.33	0.77	1.03	1.02	1.14	0.32	0.25	0.45	--	SPla/RYanodine receptor domain-containing protein [Theobroma cacao]	-	-	-	-	-	-
Podel.17G005700	magenta	223.268	19.9289	1.08	0.79	0.73	1.29	1.81	2.09	1.12	0.62	0.69	1.46	1.66	1.4	3.3	2.16	2.54	1.96	1.65	2.69	2.92	3.44	2.11	3.36	1.29	2.03	LRK10	PREDICTED: probable receptor-like protein kinase At1g67000 isoform X1 [Populus euphratica]	-	-	-	-	-	-
Podel.16G104700	magenta	137.304	19.8795	13.97	13.19	13.74	6.51	6.78	6.91	7.81	9.04	9.67	7.3	7.96	8.03	4.58	6.32	5.81	4.3	5.98	6.57	1.85	2.91	3.17	3.42	4.46	5.31	--	PREDICTED: protein FAR-RED-ELONGATED HYPOCOTYL 1-LIKE-like isoform X2 [Juglans regia]	-	-	-	-	-	-
Podel.13G039700	magenta	143.709	19.7406	1.46	2.01	2.73	2.22	2.21	2.65	1.8	1.74	1.22	3.47	1.13	1.87	5.9	3.09	3.31	2.54	2.38	2.65	4.38	5.15	5.23	6.33	3.53	4.65	--	MtN26 family protein [Populus trichocarpa]	-	-	-	-	-	-
Podel.07G061600	magenta	154.655	19.3117	10.15	19.23	13.43	9.99	7.38	11.97	8.13	8.81	15.29	12.69	14.1	15.99	2.47	2.53	2.69	3.72	3.89	5.15	1.12	2.1	1.76	3.43	2.2	1.9	LBD37	LOB domain protein 39 [Populus trichocarpa]	-	-	-	-	-	-
Podel.18G036600	magenta	171.331	18.9751	0.88	1.36	0.92	2.11	1.99	1.75	1.05	1.08	0.91	0.8	0.96	0.72	2.84	2.46	1.83	1.11	1.61	2.07	2.93	2.41	2.88	1.87	1.75	3.69	KAT3	K+ rectifying channel family protein [Populus trichocarpa]	-	-	-	-	GO:0031224//intrinsic component of membrane;GO:0043231//intracellular membrane-bounded organelle	GO:0005267//potassium channel activity
Podel.03G162700	magenta	144.516	18.8663	0.21	0.25	0.22	0.32	0.19	0.4	0.31	0.35	0.37	0.32	0.27	0.42	0.94	1.05	0.71	0.29	0.84	0.3	1.08	1.02	1.73	0.66	0.7	0.96	At3g47570	PREDICTED: probable LRR receptor-like serine/threonine-protein kinase At3g47570 [Populus euphratica]	-	-	-	-	-	GO:0016772//transferase activity, transferring phosphorus-containing groups
Podel.01G421600	magenta	121.877	18.167	10.67	7.56	4.74	6.07	3.56	4.3	6.61	8.29	10.44	3.79	5.2	4.18	1.28	3.1	2.35	0.93	1.62	2.32	0.36	0.42	0.34	0.8	1.47	0.92	SPL4	squamosa promoter-binding protein 20 [Populus tomentosa]	-	-	-	-	-	-
Podel.04G026000	magenta	156.989	17.647	2.72	2.19	1.91	6.2	6.65	3.27	2.78	2.02	2.58	5.16	4.27	4.65	5.15	6.29	4.33	6.22	6.15	7.02	10.03	7.83	6.85	6.73	5.37	6.96	CRK10	cysteine-rich receptor-like protein kinase 10 [Populus tomentosa]	-	-	-	-	-	-
Podel.07G050500	magenta	174.922	17.3038	0.24	0.25	0.42	1.8	1.93	0.57	0.61	0.51	0.14	1.08	1.7	0.4	2.1	2.07	1.27	1.2	1.31	1.87	2.69	2.52	1.35	2	1.58	1.81	RCCR	PREDICTED: red chlorophyll catabolite reductase-like [Populus euphratica]	Metabolism;Metabolism	Global and overview maps;Metabolism of cofactors and vitamins	ko01110//Biosynthesis of secondary metabolites;ko00860//Porphyrin and chlorophyll metabolism	K13545;K13545	-	-
Podel.01G104000	magenta	165.79	17.1604	37.06	36.69	31.1	19.61	12.97	23.21	18.79	23.11	20.11	14.8	19.7	17.78	5.58	12.28	7.84	10.54	14.22	11.38	3.52	5.18	6.19	12.99	13.62	21.2	GSVIVT00026920001	PREDICTED: probable polygalacturonase [Populus euphratica]	-	-	-	-	-	GO:0016787//hydrolase activity
Podel.14G071300	magenta	106.13	17.0199	4.99	3.04	4.98	2.48	4.54	4.24	3.99	4.39	5.33	4.08	4.13	2.75	2.11	2.64	2.04	3.06	1.65	2.81	1.19	1.72	1.35	2.01	1.59	2.44	CML25	PREDICTED: probable calcium-binding protein CML23 [Populus euphratica]	-	-	-	-	-	-
Podel.07G047000	magenta	155.857	16.9854	7.94	10.69	7.73	3.83	4.01	6.85	5.07	5.86	7.38	3.13	4.83	3.55	1.48	1.44	1.54	2.82	3.29	4.89	0.98	1.65	1.58	2.93	5.32	3.44	--	Uncharacterized protein TCM_000563 [Theobroma cacao]	-	-	-	-	-	-
Podel.16G064900	magenta	131.677	16.9128	5.19	5.41	4.33	1.29	1.98	3.56	1.51	4.09	3.68	0.93	4.03	2.43	0.59	1.6	1.52	0.82	1.99	1.42	0.16	0.44	0.52	1.14	0.8	1.42	DIR21	PREDICTED: dirigent protein 22-like [Populus euphratica]	-	-	-	-	-	-
Podel.15G042800	magenta	105.627	16.8747	2.08	2.35	0.56	7.61	1.98	2.29	3.72	3.19	1.7	8.18	3.56	2.37	10.19	15.7	10.58	4.76	5.46	5.81	10.98	14.23	12.09	12.58	5.88	16.27	LAC1	PREDICTED: laccase-1-like [Populus euphratica]	-	-	-	-	GO:0005576//extracellular region	GO:0016682//oxidoreductase activity, acting on diphenols and related substances as donors, oxygen as acceptor;GO:0043169//cation binding
Podel.07G152400	magenta	162.445	16.0111	1.67	2.18	1.54	3.99	2.65	2.21	0.61	0.62	0.69	1.45	3.8	0.84	6.98	2.56	3.03	2.9	3.32	4.56	4.61	6.81	4.13	7.49	3.03	4.12	UGT74E2	PREDICTED: UDP-glycosyltransferase 74E1-like isoform X1 [Populus euphratica]	-	-	-	-	-	GO:0016757//transferase activity, transferring glycosyl groups
Podel.01G303700	magenta	139.18	15.7012	2.31	1.44	2.72	1.87	1.61	3.42	3.78	1.8	1.3	2.26	0.73	1.86	3.85	5.01	5.97	3.84	5.24	4.65	7.52	4.95	8.03	3.37	3.96	4.69	BHLH25	PREDICTED: transcription factor bHLH18-like [Populus euphratica]	-	-	-	-	-	-
Podel.14G028200	magenta	199.016	15.6901	0.23	0.08	0.15	0.15	0.52	0.26	0.5	0.36	0.16	0.45	0.65	0.53	1.65	0.69	1.25	0.57	0.48	0.34	1.03	1.73	1.66	0.44	0.49	1.19	GLR2.7	PREDICTED: glutamate receptor 2.7-like [Populus euphratica]	-	-	-	-	GO:0016020//membrane	-
Podel.T257000	magenta	211.225	15.5017	1.97	1.81	2.47	1.88	1.93	2.56	2.11	1.82	2.33	1.47	1.2	1.83	5.04	3.22	6.13	1.63	3.47	2.27	3.92	5.82	6.18	2.53	2.64	3.97	9DC3	PREDICTED: receptor-like protein 12 [Populus euphratica]	-	-	-	-	-	-
Podel.04G236800	magenta	107.952	15.4853	0.99	0.57	1.26	1.5	1.22	1.29	0.92	1.06	0.95	1.62	2	2	2.2	2.27	2.09	2.61	1.65	2.6	2.48	2.45	3.18	2.8	1.66	2.12	At5g49770	leucine-rich repeat family protein [Populus trichocarpa]	-	-	-	-	-	GO:0004702//receptor signaling protein serine/threonine kinase activity;GO:0016628//oxidoreductase activity, acting on the CH-CH group of donors, NAD or NADP as acceptor;GO:0032550//purine ribonucleoside binding
Podel.07G037500	magenta	114.864	15.2142	11.83	20.53	16.66	8.13	4.8	21.4	10.72	9.12	22.23	7.77	8.76	12.28	3.25	6.5	4.61	3.53	6.31	4.73	1.98	2.2	2.46	3.89	5.13	6.33	At2g23790	PREDICTED: calcium uniporter protein 2, mitochondrial [Populus euphratica]	-	-	-	-	-	-
Podel.T182600	magenta	126.223	14.6099	1.7	1.83	1.74	1.44	1.88	1.42	2.11	2.23	2.91	2.04	2.04	1.41	0.85	0.82	0.61	0.55	1.24	1.79	0.7	0.31	0.31	0.7	0.6	1.15	5MAT	PREDICTED: phenolic glucoside malonyltransferase 1-like [Populus euphratica]	-	-	-	-	-	-
Podel.05G112800	magenta	116.504	14.5941	13.48	14.06	19.72	60.05	24.2	33.4	17.5	11.16	26.36	32.29	22.12	23.04	52.45	34.59	39.74	34.61	44.12	32.33	43.3	42.6	54.25	39.47	45.7	62.9	--	PREDICTED: dirigent protein 19-like [Theobroma cacao]	-	-	-	-	-	-
Podel.14G144100	magenta	115.581	14.1254	0.24	0.49	0.68	1	1.07	0.89	0.23	0.26	0.28	0.65	0.26	0.85	0.92	0.72	0.78	0.54	0.97	1.26	1.18	1.37	1.27	1.18	1.02	1.43	GH3.6	PREDICTED: probable indole-3-acetic acid-amido synthetase GH3.6 [Populus euphratica]	Environmental Information Processing	Signal transduction	ko04075//Plant hormone signal transduction	K14487	-	-
Podel.06G113100	magenta	147.056	13.8948	13.27	14.35	12.32	13.26	14.95	10.92	20.51	20.36	21.21	17.49	26.02	13.4	7.51	12.55	6.1	11.04	9.63	11.84	5.23	6.8	4.06	8.16	8.26	7	PYL4	PREDICTED: abscisic acid receptor PYL4-like [Populus euphratica]	Environmental Information Processing;Environmental Information Processing	Signal transduction;Signal transduction	ko04075//Plant hormone signal transduction;ko04016//MAPK signaling pathway - plant	K14496;K14496	-	-
Podel.02G128400	magenta	151.374	13.7057	2.73	2.34	3.3	0.98	1.22	3.99	1.42	1.86	2.38	2.75	3.23	3.52	0.3	0.72	0.47	1.36	1.7	0.96	0.33	0.17	0.85	0.94	1.1	1.5	--	PREDICTED: digestive organ expansion factor homolog [Nicotiana attenuata]	-	-	-	-	-	-
Podel.T046300	magenta	101.989	13.198	0.05	0	0.14	0.89	0.13	0.41	0.12	0.09	0	0.33	0.18	0.11	0.89	1.04	0.42	0.18	0.18	0.21	0.62	1.16	0.78	1.05	0.71	0.49	LECRKS5	PREDICTED: probable L-type lectin-domain containing receptor kinase S.5 [Populus euphratica]	-	-	-	-	-	GO:0004713//protein tyrosine kinase activity;GO:0032550//purine ribonucleoside binding
Podel.10G213700	magenta	28.2517	12.4728	4	6.99	8.51	1.07	3.2	13.18	1.45	1.41	3.69	1.15	2.02	2.09	0.36	0.66	1.12	0.51	0.09	0.47	0.13	0.09	0.17	0.43	0.85	1.09	--	hypothetical protein POPTR_0010s21590g [Populus trichocarpa]	-	-	-	-	-	-
Podel.07G030900	magenta	104.453	12.2865	0.15	0.81	0.17	1.06	0.7	0.31	0.22	0.07	0	0.4	0.58	0.22	1.39	0.49	0.71	0.51	0.85	0.23	1.4	1.38	1.79	0.56	1.65	1.57	PDR17	PREDICTED: random slug protein 5-like [Populus euphratica]	-	-	-	-	GO:0044464//cell part	-
Podel.11G120900	magenta	91.8553	12.0018	0.71	1.03	1.03	1.45	0.79	1.25	1.04	0.44	0.58	1.01	0.65	1.23	1.91	1.77	2.55	1.2	1.01	1.3	1.32	2.61	1.86	2.69	1.41	1.73	--	BnaCnng30330D [Brassica napus]	-	-	-	-	-	-
Podel.03G229000	magenta	64.7573	11.7278	0.11	0.11	0.25	1.53	0.94	1.13	0.2	0.21	0.28	0.68	0.39	0.48	0.96	0.67	0.8	0.4	0.82	0.83	1.39	1.27	1.5	2.54	1.35	1.73	LECRK3	PREDICTED: G-type lectin S-receptor-like serine/threonine-protein kinase RLK1 [Populus euphratica]	-	-	-	-	-	GO:0004672//protein kinase activity;GO:0032550//purine ribonucleoside binding
Podel.01G441100	magenta	120.257	11.6962	2.9	2.55	2.44	6.36	3.59	3.37	2.2	1.67	2.69	3.96	3.69	2.97	5.65	4.17	6.98	4.39	3.77	7.19	5.82	4.65	6.89	9.27	3.37	5.17	At4g27290	PREDICTED: G-type lectin S-receptor-like serine/threonine-protein kinase At4g27290 isoform X3 [Populus euphratica]	-	-	-	-	-	-
Podel.05G118900	magenta	45.7587	11.4974	127.53	172.13	186.35	95.87	116.29	198.01	87.29	70.86	104.51	80.17	76.77	103.92	69.16	61.57	88.01	71.22	93.52	108.6	38.41	38.75	29.79	78.8	63.24	89.71	--	PREDICTED: protein GDAP2 homolog [Populus euphratica]	-	-	-	-	-	-
Podel.02G261000	magenta	112.151	11.4422	3.52	5.72	3.06	24.33	15.83	11.81	3.82	2.08	3.22	12.28	16.54	6.87	17.19	7.85	14.34	15.66	19.79	21.04	19.17	25.04	40.67	21.34	27.43	15.04	UGT75L6	PREDICTED: crocetin glucosyltransferase, chloroplastic-like [Populus euphratica]	Metabolism	Global and overview maps	ko01110//Biosynthesis of secondary metabolites	K21371	-	-
Podel.01G344700	magenta	15.4497	11.2666	17.98	67.95	70.46	8.1	10.32	154.32	6.8	4.58	10.19	5.59	13.94	8.41	9.89	7.03	17.08	3	5.52	11.18	1.56	2.09	1.59	3.57	2.34	5.77	GDPD1	PREDICTED: glycerophosphodiester phosphodiesterase GDPD1, chloroplastic-like isoform X1 [Populus euphratica]	-	-	-	-	-	GO:0042578//phosphoric ester hydrolase activity
Podel.06G074900	magenta	21.842	11.2396	11.14	27.38	22.52	8.63	10.46	32.69	7.9	7.14	10.5	7.47	9.3	11.31	9.95	7.14	12.37	4.89	8.03	9.29	3.92	3.82	2.61	6.4	4.82	7.39	SPX2	PREDICTED: SPX domain-containing protein 2-like [Populus euphratica]	-	-	-	-	-	-
Podel.18G139700	magenta	17.4956	11.15	47.04	84.37	83.4	29.42	36.69	127.85	38.66	30.91	38.3	30.79	34.04	34.6	39.64	32.44	53.16	31.67	34.74	45.98	20.52	16.9	17.72	33.41	26.61	31.95	SPX2	SPX domain-containing family protein [Populus trichocarpa]	-	-	-	-	-	-
Podel.17G126900	magenta	99.4781	11.0783	0.1	0.5	0.36	0.8	0.41	0.35	0.22	0.18	0.25	0.31	0.41	0.12	0.76	0.8	0.72	0.27	0.58	0.49	0.9	0.91	0.45	0.69	0.41	1.06	LRK10L-2.4	PREDICTED: probable receptor-like protein kinase At1g67000 [Populus euphratica]	-	-	-	-	-	-
Podel.05G112500	magenta	68.1679	10.9877	9.65	11.09	14.64	33.6	16.02	28.34	12.1	9.26	17.97	22.45	12.39	13.37	29.79	23.85	25.81	22.24	22.35	22.03	25.11	25.93	38.1	27.18	36.9	41.43	--	PREDICTED: dirigent protein 19-like [Theobroma cacao]	-	-	-	-	-	-
Podel.01G021200	magenta	73.5616	10.9773	0.99	0.88	0.67	4.97	1.8	2.56	1.31	2.4	1.28	3.62	1.31	1.15	4.57	5.46	2.27	1.73	0.95	3.46	3.57	6.26	5.48	3.48	4.68	5.23	ANT1	PREDICTED: ADP,ATP carrier protein, mitochondrial-like [Populus euphratica]	-	-	-	-	GO:0019866//organelle inner membrane;GO:0031224//intrinsic component of membrane	-
Podel.15G033100	magenta	22.9534	10.9497	123.53	202.83	170.58	93.59	104.62	275.4	68.37	42.07	84.92	38.09	51.12	41.48	52.61	54.14	90.85	25.07	43.38	53.98	35.12	38.01	27.48	47.26	22.41	25.17	PAP17	acid phosphatase type 5 family protein [Populus trichocarpa]	Metabolism;Metabolism	Global and overview maps;Metabolism of cofactors and vitamins	ko01100//Metabolic pathways;ko00740//Riboflavin metabolism	K14379;K14379	GO:0044464//cell part	GO:0016209//antioxidant activity;GO:0042578//phosphoric ester hydrolase activity;GO:0043169//cation binding
Podel.01G342600	magenta	15.175	10.7688	9.87	43.75	44.39	2.39	3.65	74.79	4.57	3.41	5.26	1.26	2.24	1.76	5.1	4.12	11.13	1.71	3.55	3.94	0.85	1.62	0.66	1.25	1.52	2.65	GDPD2	PREDICTED: glycerophosphodiester phosphodiesterase GDPD1, chloroplastic-like isoform X1 [Populus euphratica]	-	-	-	-	-	GO:0042578//phosphoric ester hydrolase activity
Podel.04G135700	magenta	74.433	10.7407	12.67	22.22	14.87	10.73	8.85	25.87	9.17	10.93	17.06	10.16	14.26	9.27	4.48	4.65	6.86	3.88	5.64	6.8	3.3	3.47	4.85	5.88	10.31	13.92	GALM	PREDICTED: aldose 1-epimerase-like [Populus euphratica]	Metabolism;Metabolism;Metabolism;Metabolism	Global and overview maps;Global and overview maps;Carbohydrate metabolism;Carbohydrate metabolism	ko01100//Metabolic pathways;ko01110//Biosynthesis of secondary metabolites;ko00010//Glycolysis / Gluconeogenesis;ko00052//Galactose metabolism	K01785;K01785;K01785;K01785	-	GO:0005488//binding;GO:0016857//racemase and epimerase activity, acting on carbohydrates and derivatives
Podel.07G156900	magenta	16.3872	10.7324	2.93	6.1	4.17	0.22	2.14	14.19	0.42	0.6	1.17	0.53	0.51	0.25	0.24	0.18	0.51	0.04	0.04	0.3	0.13	0.31	0.08	0.17	0.28	0.35	--	PREDICTED: LOW QUALITY PROTEIN: flavonol 4'-sulfotransferase-like [Capsicum annuum]	-	-	-	-	-	-
Podel.06G151500	magenta	17.5558	10.4677	12.1	18.3	12.58	7.04	8.99	41.3	5.73	3.91	8.55	4.81	4.31	3.6	3.56	5.04	5.57	3.49	5.1	6.76	2.47	2.15	2.63	2.23	2.88	3.1	--	BnaA10g14740D [Brassica napus]	-	-	-	-	-	-
Podel.T175300	magenta	81.0975	10.2971	15.57	5.72	10.93	32.58	26.18	31.88	18.01	15.03	15.78	43.73	21.14	38.65	36.09	45.36	31.37	45.98	44.21	49.65	40.16	41.94	50.82	36.01	34.64	43.2	At3g47200	PREDICTED: UPF0481 protein At3g47200-like [Populus euphratica]	-	-	-	-	-	-
Podel.17G065800	magenta	74.284	10.0595	7.61	17.57	14.89	5.41	5.49	27.11	10.12	9.57	17.18	8.58	15.81	15.18	5.27	6.67	5.45	3.46	6.28	5.99	2.02	2.38	2.75	5.14	4	9.48	GDPD1	PREDICTED: glycerophosphodiester phosphodiesterase GDPD1, chloroplastic-like isoform X1 [Populus euphratica]	-	-	-	-	-	GO:0042578//phosphoric ester hydrolase activity
Podel.06G026200	magenta	74.9968	9.88756	0.37	0.31	0.24	0.87	1.53	1.29	0.16	0.29	0.27	0.8	0.64	0.23	1.18	1.48	1.09	0.32	1.77	1.22	2.25	1.43	1.37	0.87	2.05	2.17	UGT85A23	PREDICTED: 7-deoxyloganetin glucosyltransferase-like isoform X1 [Populus euphratica]	Metabolism;Metabolism	Global and overview maps;Global and overview maps	ko01100//Metabolic pathways;ko01110//Biosynthesis of secondary metabolites	K21374;K21374	-	-
Podel.13G013000	magenta	17.5306	9.51134	0.78	2.24	3.39	0.23	0.61	5.43	0.6	0.49	0.88	0.52	0.6	1.51	0.15	0.43	0.26	0.2	0.92	0.24	0.13	0.26	0.28	0.5	0.86	0.45	PLDZETA1	PREDICTED: phospholipase D p1 [Populus euphratica]	Metabolism;Metabolism;Cellular Processes;Metabolism;Metabolism	Global and overview maps;Global and overview maps;Transport and catabolism;Lipid metabolism;Lipid metabolism	ko01100//Metabolic pathways;ko01110//Biosynthesis of secondary metabolites;ko04144//Endocytosis;ko00564//Glycerophospholipid metabolism;ko00565//Ether lipid metabolism	K01115;K01115;K01115;K01115;K01115	-	GO:0004620//phospholipase activity;GO:0016628//oxidoreductase activity, acting on the CH-CH group of donors, NAD or NADP as acceptor
Podel.11G139400	magenta	66.3145	9.40417	1904.54	2106.6	1711.69	1335.93	1294.23	1369.01	2240.1	2263.76	2558.64	1656.97	1573.99	1518.06	1457.07	1781.5	1770.57	1716.94	1542.77	1605.63	1023.98	1126.72	995.05	567.08	771.11	863.78	PSBR	polypeptide precursor of photosystem II family protein [Populus trichocarpa]	Metabolism;Metabolism	Global and overview maps;Energy metabolism	ko01100//Metabolic pathways;ko00195//Photosynthesis	K03541;K03541	GO:0009521//photosystem;GO:0031976//plastid thylakoid;GO:0044434//chloroplast part	-
Podel.03G042700	magenta	12.299	8.09128	12.46	14.25	22.78	9.62	9.36	59.32	11.07	7.68	8.94	9.69	7.04	9.43	7.2	7.81	12.83	8.76	10.99	17.19	2.76	4.76	4.26	9.95	5.64	6.07	At1g17710	PREDICTED: inorganic pyrophosphatase 2-like [Populus euphratica]	Metabolism;Metabolism	Global and overview maps;Metabolism of cofactors and vitamins	ko01100//Metabolic pathways;ko00750//Vitamin B6 metabolism	K13248;K13248	-	GO:0016791//phosphatase activity
Podel.03G115700	magenta	21.2793	7.99952	5.13	11.54	11.24	3.75	5.11	15.25	7.12	5.24	8.83	5.16	4.93	5.95	6.49	6.31	6.32	3.6	7.15	7.57	3.02	2.92	3.35	3.98	4.84	5.88	Slc37a2	glycerol-3-phosphate transporter family protein [Populus trichocarpa]	-	-	-	-	GO:0031224//intrinsic component of membrane	-
Podel.14G065200	magenta	11.1206	7.96347	0.31	1.13	3.8	0	0.29	12.09	0	0.04	0	0	0.23	0.18	0.04	0	0.05	0	0	0	0	0	0	0	0	0.36	SPX3	PREDICTED: SPX domain-containing protein 3-like isoform X2 [Populus euphratica]	-	-	-	-	-	-
Podel.05G080000	magenta	77.3106	7.52714	11.48	8.55	13.54	10.86	11.3	25.34	7.94	8.36	7.35	10.45	6.15	7.75	16.75	18.73	13.78	26.65	19.33	19.74	29.26	23.49	23.23	20.91	13.85	21.03	UGT85K5	PREDICTED: 7-deoxyloganetin glucosyltransferase-like isoform X1 [Populus euphratica]	Metabolism;Metabolism	Global and overview maps;Global and overview maps	ko01100//Metabolic pathways;ko01110//Biosynthesis of secondary metabolites	K21374;K21374	-	GO:0035251//UDP-glucosyltransferase activity
Podel.01G132700	magenta	22.7689	6.38122	161.19	160.04	182.13	149.2	174.54	293.4	100.05	82.52	105.53	105.04	83.9	107.23	115.63	89.08	145.76	106.99	137.83	159.56	60.92	52.41	46.22	110.29	76.36	102.29	Slc37a2	glycerol-3-phosphate transporter family protein [Populus trichocarpa]	-	-	-	-	GO:0031224//intrinsic component of membrane	-
Podel.03G192300	magenta	39.402	6.25542	0.09	0.15	0.3	0.46	0.47	0.31	0.03	0.06	0.08	0.25	0.25	0.02	0.54	0.57	0.37	0.2	0.24	0.78	0.41	1.44	0.49	0.62	1.15	0.85	PDR1	PREDICTED: pleiotropic drug resistance protein 1-like [Populus euphratica]	-	-	-	-	-	-
Podel.09G172800	magenta	30.4619	6.15358	0.88	0.73	0.83	0.64	0.5	0.87	0.59	0.45	0.49	0.58	0.54	0.6	1.32	1.28	0.92	0.9	0.47	1.33	1.07	1.3	1.27	2.47	0.79	1.51	PIX13	PREDICTED: probable serine/threonine-protein kinase Cx32, chloroplastic isoform X1 [Populus euphratica]	-	-	-	-	GO:0016020//membrane	GO:0004713//protein tyrosine kinase activity;GO:0032550//purine ribonucleoside binding
Podel.05G226100	magenta	68.971	5.98136	24.38	18.37	24.42	25.11	24.3	14.11	50.32	35.92	36.91	28.61	18.13	19.11	12.81	19.99	12.26	6.87	13.87	17.19	7.61	8.23	9.25	9.69	17.83	16.75	CACLH	PREDICTED: chlorophyllase-1, chloroplastic-like [Populus euphratica]	Metabolism;Metabolism;Metabolism	Global and overview maps;Global and overview maps;Metabolism of cofactors and vitamins	ko01100//Metabolic pathways;ko01110//Biosynthesis of secondary metabolites;ko00860//Porphyrin and chlorophyll metabolism	K08099;K08099;K08099	-	-
Podel.17G144600	magenta	41.3766	5.81693	0.58	0.47	0.36	1.77	0.1	2.77	0.48	0.21	0.39	0.89	0.4	0.21	2.98	1.78	3.03	1.3	0.44	2.13	0.57	5.84	1.92	3.96	3.17	1.72	PLP2	PREDICTED: patatin-like protein 2 isoform X2 [Populus euphratica]	-	-	-	-	-	-
Podel.08G160300	magenta	16.7751	5.55283	2.01	11.73	5.57	0.55	3.52	7.82	0.32	0.23	0.46	0.43	1.42	0.46	0.17	0.45	0.27	0.19	0.49	0.35	0.11	0.4	0.43	0.29	0.21	0.05	PAP3	PREDICTED: purple acid phosphatase 4-like [Populus euphratica]	Metabolism;Metabolism	Global and overview maps;Metabolism of cofactors and vitamins	ko01100//Metabolic pathways;ko00740//Riboflavin metabolism	K14379;K14379	-	GO:0003824//catalytic activity
Podel.14G019700	magenta	32.5928	5.5447	1.46	6.45	3	8.06	8.48	6.11	2.03	1.46	2.48	5.41	7.27	1.99	10.47	4.21	5.8	1.93	10.79	7.46	8.6	12.68	9.91	10.89	20.18	11.06	CYP81F3	PREDICTED: cytochrome P450 81D11-like [Populus euphratica]	-	-	-	-	-	GO:0016491//oxidoreductase activity;GO:0046906//tetrapyrrole binding;GO:0046914//transition metal ion binding
Podel.02G069100	magenta	29.6497	5.3675	2.46	2.44	3.19	2.9	3.46	3.89	2.98	5.09	3.39	8.79	4.52	9.77	6.03	6.91	4.56	6.49	7.85	6.78	8.6	9.78	10.06	7.73	7.38	7.02	At4g09760	PREDICTED: probable choline kinase 3 [Populus euphratica]	Metabolism;Metabolism	Global and overview maps;Lipid metabolism	ko01100//Metabolic pathways;ko00564//Glycerophospholipid metabolism	K14156;K14156	-	GO:0016772//transferase activity, transferring phosphorus-containing groups
Podel.12G043800	magenta	38.4809	5.013	37.47	36.15	35.89	40.51	38.73	40.3	19.39	20.37	23.61	18.1	21.3	19.22	19.76	15.64	19.67	12.33	18.74	18.02	14.59	16.66	14.29	15.48	17.58	21.33	Rv0183	hydrolase family protein [Populus trichocarpa]	Metabolism;Metabolism	Global and overview maps;Lipid metabolism	ko01100//Metabolic pathways;ko00561//Glycerolipid metabolism	K01054;K01054	-	-
Podel.T131600	magenta	8.61143	4.74889	0.12	0.23	0.12	0.71	0.94	6.43	0.15	0.18	0.2	0.2	0.14	0	0	0	0	0	0.27	0	0.1	2.22	0.13	0.93	1.91	0.28	--	potato inhibitor I family protein [Populus alba x Populus glandulosa]	-	-	-	-	-	-
Podel.01G096500	magenta	31.453	4.67501	1.17	1.63	1.34	1.45	1.05	0.85	0.44	0.34	0.86	0.81	0.87	0.54	1.7	1.36	2.12	0.81	0.71	1.27	2.64	1.51	3.16	5.37	1.45	1.64	WRKY41	WRKY transcription factor 41 family protein [Populus trichocarpa]	-	-	-	-	-	GO:0003677//DNA binding
Podel.14G058300	magenta	44.2711	4.60668	31.35	13.55	14.24	38.95	59.96	23.41	22.44	15.11	19.76	30.19	20.44	36.2	43.08	51.88	33.23	23.99	70.37	60.73	50.69	44.05	35.72	49.86	48.17	48.31	At3g47200	PREDICTED: UPF0481 protein At3g47200-like [Populus euphratica]	-	-	-	-	-	-
Podel.T289300	magenta	36.2084	4.58915	12.68	2.4	4.2	16.57	7.54	5.75	11.74	6.39	12.75	14.69	7.33	15.53	0.54	1.58	2.9	3.4	2.12	5.58	0.22	0.33	0.06	0.69	0.07	0.73	GRXS2	glutaredoxin family protein [Populus trichocarpa]	-	-	-	-	-	GO:0015036//disulfide oxidoreductase activity
Podel.01G479700	magenta	11.8119	4.46566	0	0.11	0.22	0.22	0.33	0.61	0.05	0	0	0.09	0.08	0.04	0.06	0.04	0.17	0	0	0	0.16	0.6	0.33	1.06	0.95	0.56	CBDAS2	PREDICTED: cannabidiolic acid synthase-like 1 [Populus euphratica]	-	-	-	-	-	-
Podel.10G109600	magenta	6.53634	4.46214	6.34	9.69	13.59	3.78	4.51	14.33	4.86	4.27	5.45	3.38	4.18	4.63	8.15	7.6	7.92	4.51	7.08	7.05	5.57	4.84	4.72	5.36	4.05	6.19	--	BnaA07g38920D [Brassica napus]	-	-	-	-	-	-
Podel.13G042300	magenta	19.2055	4.3533	0.19	0.56	0.89	0.82	1.5	1	0.43	0.35	0.26	0.76	0.38	0.13	0.72	0.49	0.41	0.37	0.51	0.25	0.98	1.5	1.55	2.2	2.29	1.51	CML3	PREDICTED: calmodulin-like protein 8 [Populus euphratica]	-	-	-	-	-	GO:0016491//oxidoreductase activity
Podel.05G160600	magenta	21.0487	4.29816	20.96	18.71	23.12	17.34	20.23	25.36	9.13	10.55	11.97	11.8	9.84	9.19	11.44	12.16	13.27	10.79	9.91	13.01	13.34	10.84	10.82	12.03	13.3	16.16	--	-	-	-	-	-	-	-
Podel.13G044900	magenta	9.45739	4.17087	0.75	3.12	1.65	7.43	5.33	19.92	2.51	2.14	0.31	2.84	1.78	1.08	4.91	1.71	2.57	1.32	1.01	3.02	1.99	11.22	4	22.53	18.24	10.75	HEV1	PREDICTED: pathogenesis-related protein PR-4-like isoform X2 [Populus euphratica]	-	-	-	-	-	-
Podel.16G136500	magenta	18.775	3.99337	0.1	0.15	0	0.71	0	0.2	0	0.04	0.04	0.17	0.06	0.05	0.56	0.05	0.19	0.06	0.06	0.16	0.48	0.66	0.46	0.79	0.56	1.74	At5g01750	PREDICTED: protein LURP-one-related 15-like isoform X1 [Populus euphratica]	-	-	-	-	-	-
Podel.10G055700	magenta	7.70342	3.94216	0	0.39	0	0.68	0.77	6.9	0	0.1	0	0.23	0.31	0.4	0	0.13	0	0.6	0.46	0.14	0.35	3.54	0.61	1.82	1.17	0.16	--	potato inhibitor I family protein [Populus alba x Populus glandulosa]	-	-	-	-	-	-
Podel.10G017000	magenta	14.139	3.92595	24.77	6.24	9.71	7.55	2.31	4.49	4.04	2.11	6.43	2.24	1.53	0.61	0.64	0.86	1.3	0.1	0.61	0.09	0	0	0	0.7	0.11	0.11	GRXS2	glutaredoxin family protein [Populus trichocarpa]	-	-	-	-	-	GO:0015036//disulfide oxidoreductase activity
Podel.02G141000	magenta	35.1437	3.86711	17.85	8.06	23.33	17.35	18.63	19.58	16.87	11.6	11.2	9.32	7.17	6.41	18.88	19.08	27.47	11.16	28.06	17.4	20.88	19.55	35.34	14.79	29.92	31.14	PLP2	patatin-like family protein [Populus trichocarpa]	-	-	-	-	-	GO:0003824//catalytic activity
Podel.17G003500	magenta	11.0231	3.71398	0.73	1.04	0.74	0.21	0.47	3	1.64	0.34	0.21	0.65	0.62	0.85	1.81	0.24	0.84	0.19	0.24	0.3	1.32	2.84	3.69	5.38	2.77	4.33	AER	PREDICTED: NADP-dependent alkenal double bond reductase P2-like [Populus euphratica]	-	-	-	-	-	GO:0016628//oxidoreductase activity, acting on the CH-CH group of donors, NAD or NADP as acceptor
Podel.04G000100	magenta	8.92795	3.50084	0.6	1.9	0.9	10.81	7.02	28.85	1.86	0.34	0.18	3.98	0.34	0.29	0.29	0.42	0.87	4.76	1.08	0.52	1.14	15.55	3.72	21.11	26	1.06	ASP	Kunitz-type trypsin inhibitor C5 [Populus nigra]	-	-	-	-	-	-
Podel.19G046000	magenta	25.8503	3.49563	23.92	22.56	17.33	43.53	27.87	24.2	55.26	53.13	46.98	50.36	40.82	68.19	56	69.89	64.52	48.5	69.96	65.06	78.26	43.18	57.46	42.52	49.11	58.78	HSR201	benzoyl-CoA:benzyl alcohol O-benzoyltransferase [Populus trichocarpa]	-	-	-	-	-	GO:0016413//O-acetyltransferase activity
Podel.05G262900	magenta	20.6708	3.49221	4.81	8.29	6.65	6.04	8.15	13.66	2.44	1.98	1.85	5.55	5.73	2.23	3.96	2.15	5.16	3.34	4	5.06	4.14	6.79	2.25	5.85	2.18	2.3	--	PREDICTED: rho GTPase-activating protein gacY-like [Populus euphratica]	-	-	-	-	-	-
Podel.04G055400	magenta	14.0851	3.47134	241.56	73.19	138.5	27.1	99.88	23.14	134.21	68.09	37.2	94.38	55.52	28.45	40.97	18.78	55.93	17.49	2.8	30.83	9.21	22.1	18.84	20.59	1.52	2.19	--	PREDICTED: kirola-like [Populus euphratica]	-	-	-	-	-	-
Podel.06G162000	magenta	28.0748	3.44742	0.14	0.08	0.2	1.06	0.32	0.33	0.17	0.49	0.22	0.06	0.2	0.09	0.63	0.68	0.55	0.15	0.2	0.29	0.6	0.42	0.47	0.59	0.71	0.92	BHLH	basic helix-loop-helix family protein [Populus trichocarpa]	-	-	-	-	-	-
Podel.15G147100	magenta	14.8606	3.38123	2.63	2.14	4.28	8.92	2.01	3.66	9.03	10.35	7.51	12.36	6.75	7.7	5.96	10.04	6.92	9.1	7.35	12.85	35.93	6.87	28.6	17.69	18.63	35.13	--	PAR1 protein [Medicago truncatula]	-	-	-	-	-	-
Podel.T131800	magenta	8.91121	3.35108	2.06	3.34	4	4.81	4.05	34.63	1.7	1.54	1.29	1.97	1.16	0.98	0	0.97	1.03	1.75	4.07	3.33	1.56	29.92	8.1	30.53	11.78	5.85	PIIF	potato inhibitor I family protein [Populus alba x Populus glandulosa]	-	-	-	-	-	-
Podel.07G021600	magenta	47.1586	3.3327	1.97	0.85	1.07	2.51	4.17	1.12	3.54	2.15	2.05	3.44	0.67	1.92	3.26	6.71	8.1	5.01	6.1	5.07	5.14	9.5	2.27	3.14	1.56	4.03	PER72	class III peroxidase [Populus trichocarpa]	Metabolism;Metabolism;Metabolism	Global and overview maps;Global and overview maps;Biosynthesis of other secondary metabolites	ko01100//Metabolic pathways;ko01110//Biosynthesis of secondary metabolites;ko00940//Phenylpropanoid biosynthesis	K00430;K00430;K00430	-	GO:0003824//catalytic activity;GO:0043169//cation binding;GO:0046906//tetrapyrrole binding
Podel.16G138200	magenta	10.5472	3.20121	1.37	0.46	1.91	1.63	1.52	4.03	0.97	0.55	0.32	2.97	1.49	1.4	0.95	0.55	0.31	1.55	0.71	0.69	2.09	3	5.36	6.01	5.52	5.8	PNC1	peroxidase family protein [Populus trichocarpa]	Metabolism;Metabolism;Metabolism	Global and overview maps;Global and overview maps;Biosynthesis of other secondary metabolites	ko01100//Metabolic pathways;ko01110//Biosynthesis of secondary metabolites;ko00940//Phenylpropanoid biosynthesis	K00430;K00430;K00430	-	GO:0003824//catalytic activity;GO:0043169//cation binding;GO:0046906//tetrapyrrole binding
Podel.06G197200	magenta	9.78663	2.70993	0.21	0.96	0.61	0.8	1.3	2.18	0.82	0.08	0.25	0.21	0.17	0.05	0.2	0.14	0.09	0.56	0.28	0.05	0.65	2.66	1.19	4.66	2.11	0.3	ChiC	PREDICTED: chitotriosidase-1-like [Populus euphratica]	Metabolism;Metabolism	Global and overview maps;Carbohydrate metabolism	ko01100//Metabolic pathways;ko00520//Amino sugar and nucleotide sugar metabolism	K01183;K01183	-	GO:0004553//hydrolase activity, hydrolyzing O-glycosyl compounds
Podel.03G150100	magenta	11.1582	2.7091	23.43	6.41	9.36	5	8.06	1.56	5.84	2.84	2.7	12.96	1.17	7.68	1.18	1.25	2.89	1.86	0.95	3.33	0.81	1.86	1.05	0.62	0.11	0.11	--	unknown [Populus trichocarpa]	-	-	-	-	-	-
Podel.10G159200	magenta	20.3299	2.63302	38.54	32.7	28.23	24.88	31.67	45.15	22.23	17.93	22.52	16.01	16.19	17.76	21.53	19.34	26.1	15.01	12.2	14.5	25.62	25.6	26.36	18.68	16.81	15.92	PAP1	PREDICTED: probable inactive purple acid phosphatase 1 isoform X2 [Populus euphratica]	-	-	-	-	-	-
Podel.19G099000	magenta	19.0855	2.44695	0.28	0.33	0.22	1.84	0.61	1.13	0.32	0.28	0.57	1.55	1.33	1.82	1.36	1.97	0.93	2.97	1.75	2.24	2.16	1.81	1.04	5.75	0.94	2.57	At1g51860	PREDICTED: probable LRR receptor-like serine/threonine-protein kinase At1g05700 isoform X2 [Populus euphratica]	-	-	-	-	-	GO:0016301//kinase activity
Podel.10G084800	magenta	7.43409	2.43449	0.13	0.97	0.52	0.81	2.88	7.34	0.4	0.82	0.41	2.03	2.45	0.6	0.27	0.38	0.25	0.52	0.42	0.73	0.3	0.78	0.61	2.8	3.67	1.31	At1g31672	PREDICTED: primary amine oxidase-like [Populus euphratica]	Metabolism;Metabolism;Metabolism;Metabolism;Metabolism;Metabolism;Metabolism;Metabolism	Global and overview maps;Global and overview maps;Amino acid metabolism;Amino acid metabolism;Amino acid metabolism;Metabolism of other amino acids;Biosynthesis of other secondary metabolites;Biosynthesis of other secondary metabolites	ko01100//Metabolic pathways;ko01110//Biosynthesis of secondary metabolites;ko00260//Glycine, serine and threonine metabolism;ko00360//Phenylalanine metabolism;ko00350//Tyrosine metabolism;ko00410//beta-Alanine metabolism;ko00950//Isoquinoline alkaloid biosynthesis;ko00960//Tropane, piperidine and pyridine alkaloid biosynthesis	K00276;K00276;K00276;K00276;K00276;K00276;K00276;K00276	-	GO:0016641//oxidoreductase activity, acting on the CH-NH2 group of donors, oxygen as acceptor;GO:0048037//cofactor binding
Podel.T143500	magenta	6.45137	2.40064	17.51	5.43	1.29	3.74	2.13	1.51	0.11	0	0.74	0.59	0.31	1.52	0	0	0.15	0.16	0	0.12	0	0.2	0.1	0	0.1	0	BSPA	PREDICTED: bark storage protein A-like, partial [Populus euphratica]	-	-	-	-	-	-
Podel.04G182400	magenta	25.5523	2.31615	15.25	8.97	5.12	75.55	76.22	43.89	11.72	14.67	5.55	28.41	19.44	6	77.04	32.01	62.97	14.07	88.62	62.12	60.14	37.84	54.18	31.99	73.35	233.63	UGT74E2	PREDICTED: UDP-glycosyltransferase 74E1-like isoform X1 [Populus euphratica]	-	-	-	-	-	GO:0016758//transferase activity, transferring hexosyl groups
Podel.11G157400	magenta	5.64426	2.30002	0	0	0	0	0	1.75	0	0	0	0	0	0	0	0	0	0	0	0	0.03	1.15	0.17	0	1.31	0	At1g30760	PREDICTED: cannabidiolic acid synthase-like 2 [Populus euphratica]	Metabolism;Metabolism;Metabolism	Global and overview maps;Global and overview maps;Biosynthesis of other secondary metabolites	ko01100//Metabolic pathways;ko01110//Biosynthesis of secondary metabolites;ko00940//Phenylpropanoid biosynthesis	K22395;K22395;K22395	-	-
Podel.15G087800	magenta	17.5867	2.20161	5.89	7.11	6.2	6.12	8.11	10.93	4.2	2.83	4.17	2.87	3.16	4.27	5.28	2.9	5.76	4.19	6.54	8.01	3.9	2.8	6.08	4.91	2.09	3.82	--	octicosapeptide/Phox/Bem1p domain-containing family protein [Populus trichocarpa]	-	-	-	-	-	-
Podel.15G104200	magenta	13.7911	2.06875	0.54	0.3	0.27	2.16	0.55	3.32	0.33	0.07	0.18	0.26	0.2	0.13	0.42	1.28	0.41	0.35	0.2	0.5	0.73	1.98	0.7	1.24	1.09	0.68	WRKY75	PREDICTED: probable WRKY transcription factor 43 [Populus euphratica]	-	-	-	-	-	-
Podel.T143400	magenta	6.58841	2.0451	18.14	3.44	0.37	7.84	2.69	3.18	0.15	0.05	1.43	1.29	0.22	0	0.07	0	0.12	0	0	0.16	0	0	0	0.04	0	0.22	BSP	PREDICTED: bark storage protein B-like [Populus euphratica]	-	-	-	-	-	-
Podel.14G057400	magenta	5.05586	1.93068	0	0.46	0.49	0	0.27	3.29	1.8	0.74	0.4	0.6	0	0.47	0.19	0	0	0	0.54	0.24	0.4	0	0.27	0.26	0.91	0.85	--	StAR lipid transfer-like protein [Arabidopsis thaliana]	-	-	-	-	-	-
Podel.02G285400	magenta	9.46999	1.90486	0.03	0.03	0.13	0.27	0.12	0.1	0.25	0.17	0.09	0.27	0.08	0.25	0.12	0.34	0.28	0.07	0.12	0.03	0.19	0.2	0.81	0.27	0.38	0.8	MIK2	PREDICTED: probable LRR receptor-like serine/threonine-protein kinase At4g08850 [Populus euphratica]	-	-	-	-	GO:0016020//membrane	GO:0004672//protein kinase activity;GO:0016491//oxidoreductase activity;GO:0036094//small molecule binding;GO:0097159//organic cyclic compound binding;GO:1901363//heterocyclic compound binding
Podel.06G060900	magenta	13.7727	1.70538	0.49	0.36	0.49	0.51	0.24	0.3	0.84	0.63	0.56	1.03	0.83	0.89	0.52	0.76	0.79	0.85	0.72	0.98	0.93	0.77	0.92	0.69	0.57	0.54	FTIP1	PREDICTED: multiple C2 and transmembrane domain-containing protein 1-like [Populus euphratica]	-	-	-	-	-	GO:0016740//transferase activity
Podel.01G304000	magenta	6.79972	1.04342	0.28	0.22	0.46	0.54	0.2	0.36	0.85	0.72	0.86	1.66	0.93	1.05	0.64	1.3	0.54	1.51	1.38	0.79	1.1	1.97	0.76	0.55	1.11	0.69	--	hypothetical protein POPTR_0001s29430g [Populus trichocarpa]	-	-	-	-	-	-
Podel.08G129900	magenta	3.28925	1.0236	0.08	0.19	0	0.02	0.05	1.36	0.1	0.28	0.13	0	0	0	0.5	1.23	0	0.27	0	1.2	0	1.46	0	0.84	1.3	1.12	--	DUF1262 family protein [Medicago truncatula]	-	-	-	-	-	-
Podel.17G118000	magenta	6.37125	0.7345	22.74	80.94	3.93	4.89	15.49	10.01	25.59	14.36	17.13	19.2	60.45	28.07	44.42	49.49	21.68	61.37	4.47	43.99	34.74	60.56	18.48	182.28	18.76	43.38	--	unknown [Populus trichocarpa]	-	-	-	-	-	-
Podel.14G151000	magenta	4.9134	0.599793	1.37	1.6	1.79	9.07	3.59	2.3	1.75	2.55	9.2	5.35	3.93	7.18	2.52	10.17	3.54	3.32	6.11	8.81	10.05	2.26	9.98	3.78	3.53	8.4	PER52	peroxidase family protein [Populus trichocarpa]	Metabolism;Metabolism;Metabolism	Global and overview maps;Global and overview maps;Biosynthesis of other secondary metabolites	ko01100//Metabolic pathways;ko01110//Biosynthesis of secondary metabolites;ko00940//Phenylpropanoid biosynthesis	K00430;K00430;K00430	-	GO:0003824//catalytic activity;GO:0043169//cation binding;GO:0046906//tetrapyrrole binding
Podel.08G036900	magenta	3.86229	0.541725	5.12	1.24	3.83	0.74	1.92	0	3.31	1.88	1.97	2.09	2.99	0.43	0.49	1.61	1.19	0.5	2.85	2.8	0	0	3.76	0	2.12	0.9	--	DUF1997 domain-containing protein [Cephalotus follicularis]	-	-	-	-	-	-
Podel.08G090800	magenta	1.28465	0.303193	5.52	3.11	9.36	0	4.3	8.67	1.36	0.83	9.02	3.64	8.14	3.19	4.24	1.04	7.4	1.85	1.23	1.66	3.29	0.64	4.88	6.63	0	5.37	ASNAP2	soluble NSF attachment family protein [Populus trichocarpa]	-	-	-	-	-	-

## Sheet: Table S5
Table S5. Annotation description of the top 10 genes for connectivity (hub genes) in the ‘magenta’ module
Gene symbol	Gene name	Annotation description
--	Podel.19G035300	Echinoderm microtubule-associated protein-like 6
--	Podel.02G021400	DUF668 domain-containing protein/DUF3475 domain-containing protein, partial
At4g24290	Podel.19G001200	PREDICTED: MACPF domain-containing protein At4g24290-like
ACR4	Podel.08G129500	PREDICTED: ACT domain-containing protein ACR4 isoform X1
ABCC3	Podel.03G215800	PREDICTED: ABC transporter C family member 3-like, partial
--	Podel.03G153500	PREDICTED: probable serine/threonine-protein kinase clkA
PIRL2	Podel.10G040100	PREDICTED: plant intracellular Ras-group-related LRR protein 3-like
At1g03370	Podel.06G003100	PREDICTED: C2 and GRAM domain-containing protein At1g03370-like
UGT88A1	Podel.04G076900	UDP-glucoronosyl/UDP-glucosyl transferase family protein UDP
PDR17	Podel.05G137500	PREDICTED: random slug protein 5-like

## Sheet: Table S6
Table S6. Annotation of transcription factors in the 'magenta' module
TF Family	Gene ID	Symbol	Description	Connectivity (Total)	Connectivity (Within)	T0-A-1	T0-A-2	T0-A-3	T0-C-1	T0-C-2	T0-C-3	T2-LN-A-1	T2-LN-A-2	T2-LN-A-3	T2-LN-C-1	T2-LN-C-2	T2-LN-C-3	T4-LN-A-1	T4-LN-A-2	T4-LN-A-3	T4-LN-C-1	T4-LN-C-2	T4-LN-C-3	T6-LN-A-1	T6-LN-A-2	T6-LN-A-3	T6-LN-C-1	T6-LN-C-2	T6-LN-C-3	KEGG_A_class	KEGG_B_class	Pathway	K_ID	GO Component	GO Function
WRKY	Podel.01G096500	WRKY41	WRKY transcription factor 41 family protein	31.453	4.67501	1.17	1.63	1.34	1.45	1.05	0.85	0.44	0.34	0.86	0.81	0.87	0.54	1.7	1.36	2.12	0.81	0.71	1.27	2.64	1.51	3.16	5.37	1.45	1.64	-	-	-	-	-	GO:0003677//DNA binding
	Podel.15G104200	WRKY75	PREDICTED: probable WRKY transcription factor 43	13.7911	2.06875	0.54	0.3	0.27	2.16	0.55	3.32	0.33	0.07	0.18	0.26	0.2	0.13	0.42	1.28	0.41	0.35	0.2	0.5	0.73	1.98	0.7	1.24	1.09	0.68	-	-	-	-	-	-
	Podel.18G019200	WRKY18	PREDICTED: probable WRKY transcription factor 40	342.538	34.2201	1.83	1.62	2.86	8.92	4.3	3.2	2.86	2.73	3.69	8.12	4.44	4.52	17.81	12.28	14.33	9.33	12.73	11.82	17.29	21.23	20.77	7.94	7.94	13.51	-	-	-	-	-	-
bHLH	Podel.01G303700	BHLH25	PREDICTED: transcription factor bHLH18-like	139.18	15.7012	2.31	1.44	2.72	1.87	1.61	3.42	3.78	1.8	1.3	2.26	0.73	1.86	3.85	5.01	5.97	3.84	5.24	4.65	7.52	4.95	8.03	3.37	3.96	4.69	-	-	-	-	-	-
	Podel.02G115300	BHLH30	PREDICTED: transcription factor bHLH30-like	291.508	23.3706	2.15	1.13	1	2.93	3.15	2.28	1.23	0.9	1.22	2.87	1.46	1.77	3.61	3.54	2.83	2.95	2.39	3.21	4.43	4.04	3.87	4.6	2.73	2.38	-	-	-	-	-	-
	Podel.06G162000	BHLH	basic helix-loop-helix family protein	28.0748	3.44742	0.14	0.08	0.2	1.06	0.32	0.33	0.17	0.49	0.22	0.06	0.2	0.09	0.63	0.68	0.55	0.15	0.2	0.29	0.6	0.42	0.47	0.59	0.71	0.92	-	-	-	-	-	-
LOB	Podel.07G061600	LBD37	LOB domain protein 39	154.655	19.3117	10.15	19.23	13.43	9.99	7.38	11.97	8.13	8.81	15.29	12.69	14.1	15.99	2.47	2.53	2.69	3.72	3.89	5.15	1.12	2.1	1.76	3.43	2.2	1.9	-	-	-	-	-	-
	Podel.08G051900	LBD1	PREDICTED: LOB domain-containing protein 1-like	201.999	21.8876	0.32	0.55	0.9	7.43	1.76	1.18	1.97	0.95	0.91	3.05	1.73	0.86	5.32	3.91	3.48	3.08	3.61	4.26	7.05	4.91	6.52	5.3	2.77	5.12	-	-	-	-	-	-
ARR-B	Podel.12G083500	WER	PREDICTED: transcription factor WER-like	283.124	24.8321	11.57	11.71	11.06	3.1	5.03	7.94	7.31	8.87	9.93	5.44	11.44	8.74	2.33	5.65	3.27	4.19	4.59	2.64	1.27	1.52	1.92	5.25	3.77	5.14	Organismal Systems	Environmental adaptation	ko04626//Plant-pathogen interaction	K09422	-	-
bZIP	Podel.06G265700	HY5	bZIP with a Ring-finger motif family protein	197.111	22.4346	3.4	3.53	4.14	5.48	4.83	6.45	3.05	3.34	4.2	3.58	3.77	2.4	8.7	7.87	6.45	4.77	4.56	4.51	8.9	7.79	8.68	10.1	5.34	7.32	Organismal Systems	Environmental adaptation	ko04712//Circadian rhythm - plant	K16241	GO:0043231//intracellular membrane-bounded organelle	GO:0001071//nucleic acid binding transcription factor activity;GO:0043566//structure-specific DNA binding
SBP	Podel.01G421600	SPL4	squamosa promoter-binding protein 20	121.877	18.167	10.67	7.56	4.74	6.07	3.56	4.3	6.61	8.29	10.44	3.79	5.2	4.18	1.28	3.1	2.35	0.93	1.62	2.32	0.36	0.42	0.34	0.8	1.47	0.92	-	-	-	-	-	-
zf-HD	Podel.12G042700	ZHD4	PREDICTED: zinc-finger homeodomain protein 1-like	216.566	20.7939	1.91	1.5	1.02	0.81	0.84	0.74	1.57	1.34	1.61	1.36	2.43	1.28	0.15	0.6	0.46	0.84	0.43	0.7	0.16	0.29	0	0.49	0.62	0.59	-	-	-	-	-	-

## Sheet: Table S7
Table S7. The reaction system of quantitative real-time reverse transcription PCR (qRT-PCR)
Reagent	Use volume
TB GreenTM Premix Ex TaqTM Ⅱ（2×）	10.0 μL
PCR Forward Primer（10μM）	0.8 μL
PCR Reverse Primer（10μM）	0.8 μL
cDNA	2.0 μL
dd H2O	6.4 μL
Total	20.0 μL

## Sheet: Table S8
Table S8. Primers used for quantitative real-time reverse transcription PCR (qRT-PCR) analysis
Gene name	Gene model	Amplification length	Primer name	Primer sequence(5'-3')
NR	Podel.05G183500	229 bp	NR-F	TCGGATCGGAGAGTTGGTTAATTC
			NR-R	CAATCCCAGCACCTGATCCTC
NiR	Podel.04G146000	209 bp	NiR-F	AGTGAGAATGCACTGGACAGG
			NiR-R	CAACCAAAGGCACCAAGTCC
GS2	Podel.10G024300	167 bp	GS2-2-F	GCATGTCCCATGACTGCAAAG
			GS2-2-R	TCAGTGTACGGAGTAAGGTCC
GDH2	Podel.15G117500	196 bp	GDH-B-F	GTTGCTAGGGCCACTCTGTT
			GDH-B-R	AGGAGGAGCTTCAACTTGGG
NRT1;1	Podel.03G118100	258 bp	NRT1-2-F	TTCTTCCTGAGAGAGTGTCC
			NRT1-2-R	CCTCTTGTCCTTGTAGACATACC
NRT1;2	Podel.12G073800	195 bp	NRT1;2-2-F	GACTGGAGGAACAGACCTGC
			NRT1;2-2-R	GGCTGTGCCCATGAAATTGG
AMT1;6	Podel.09G046000	260 bp	AMT1;6-F	AATTCAGGTGAGGCGGGAGT
			AMT1;6-R	GCGTAGAAGCGAGGATGGTT
AMT2;1	Podel.06G111800	181 bp	AMT2;1-F	TAGGTTGGAACGTGGTGTCC
			AMT2;1-R	TACAAGGTGTTCCGACCGTG
Actin2/7	-	-	ACT-F	CCCATTGAGCACGGTATTGT
			ACT-R	TACGACCACTGGCATACAGG
